# Supplementary material for: Pyroptosis-Related Signature and Tumor Microenvironment Infiltration Characterization in Head and Neck Squamous Cell Carcinoma
Source: Front Cell Dev Biol. 2022 May 31;10:702224. doi: 10.3389/fcell.2022.702224 (PMC9194563; doi:10.3389/fcell.2022.702224)
Supplement: Supplementary file 6 [file Table1.XLSX]

## Sheet: Table S1
Genes	Full-names
AIM2	Absent in melanoma 2
CASP1	cysteine-aspartic acid protease-1
CASP3	cysteine-aspartic acid protease-3
CASP4	cysteine-aspartic acid protease-4
CASP5	cysteine-aspartic acid protease-5
CASP6	cysteine-aspartic acid protease-6
CASP8	cysteine-aspartic acid protease-8
CASP9	cysteine-aspartic acid protease-9
ELANE	elastase, neutrophil expressed
GPX4	glutathione peroxidase 4
GSDMA	gasdermin A
GSDMB	gasdermin B
GSDMC	gasdermin C
GSDMD	gasdermin D
GSDME	gasdermin E
IL18	interleukin 18
IL1B	interleukin 1 beta
IL6	interleukin 6
NLRC4	NLR family CARD domain containing 4
NLRP1	NLR family pyrin domain containing 1
NLRP2	NLR family pyrin domain containing 2
NLRP3	NLR family pyrin domain containing 3
NLRP6	NLR family pyrin domain containing 6
NLRP7	NLR family pyrin domain containing 7
NOD1	nucleotide binding oligomerization domain containing 1
NOD2	nucleotide binding oligomerization domain containing 2
PJVK	pejvakin/deafness, autosomal recessive 59
PLCG1	phospholipase C gamma 1
PRKACA	protein kinase cAMP-activated catalytic subunit alpha
PYCARD	PYD and CARD domain containing
SCAF11	SR-related CTD associated factor 11
TIRAP	TIR domain containing adaptor protein
TNF	tumor necrosis factor

## Sheet: Table S2
id	logFC	AveExpr	t	P.Value	adj.P.Val	B
KEGG_NOD_LIKE_RECEPTOR_SIGNALING_PATHWAY	-0.243937	-0.0193324	-12.1196	5.0607e-30	9.26107e-28	57.3727
KEGG_MAPK_SIGNALING_PATHWAY	-0.12699	-0.0064731	-11.2982	1.11791e-26	1.02288e-24	49.7916
KEGG_PRION_DISEASES	-0.181368	0.0181118	-9.81147	5.35528e-21	3.26672e-19	36.9305
KEGG_FOCAL_ADHESION	-0.221881	-0.012344	-9.6988	1.37348e-20	6.28368e-19	36.0054
KEGG_ECM_RECEPTOR_INTERACTION	-0.270981	-0.0158264	-9.50507	6.81729e-20	2.49513e-18	34.4324
KEGG_RENIN_ANGIOTENSIN_SYSTEM	-0.230229	-0.0133656	-8.73644	3.13851e-17	9.57245e-16	28.4174
KEGG_GAP_JUNCTION	-0.152301	-0.0186479	-8.57767	1.06338e-16	2.62451e-15	27.2217
KEGG_CYTOKINE_CYTOKINE_RECEPTOR_INTERACTION	-0.188173	0.00405169	-8.56772	1.14733e-16	2.62451e-15	27.1473
KEGG_JAK_STAT_SIGNALING_PATHWAY	-0.155826	0.00351335	-8.46336	2.53432e-16	5.15311e-15	26.3711
KEGG_PATHWAYS_IN_CANCER	-0.105571	0.0031351	-8.3142	7.76918e-16	1.42176e-14	25.2742
KEGG_CHEMOKINE_SIGNALING_PATHWAY	-0.162742	0.0055232	-8.14516	2.7162e-15	4.51877e-14	24.0493
KEGG_SMALL_CELL_LUNG_CANCER	-0.132727	0.0157007	-7.8896	1.73692e-14	2.6488e-13	22.2348
KEGG_GLYCOSAMINOGLYCAN_BIOSYNTHESIS_CHONDROITIN_SULFATE	-0.226517	0.00611234	-7.78352	3.70275e-14	5.21234e-13	21.4949
KEGG_REGULATION_OF_ACTIN_CYTOSKELETON	-0.126478	-0.00739604	-7.75905	4.40438e-14	5.75716e-13	21.3254
KEGG_TGF_BETA_SIGNALING_PATHWAY	-0.134092	-0.0134789	-7.56205	1.75326e-13	2.13897e-12	19.9761
KEGG_BUTANOATE_METABOLISM	0.17614	0.00499185	7.52353	2.28971e-13	2.61885e-12	19.7155
KEGG_ARRHYTHMOGENIC_RIGHT_VENTRICULAR_CARDIOMYOPATHY_ARVC	-0.169605	-0.0241152	-7.44453	3.94526e-13	4.13185e-12	19.1844
KEGG_MELANOMA	-0.108968	0.0089279	-7.44005	4.06834e-13	4.13185e-12	19.1544
KEGG_PEROXISOME	0.128908	0.000920561	7.43231	4.2899e-13	4.13185e-12	19.1027
KEGG_HEMATOPOIETIC_CELL_LINEAGE	-0.202813	0.0105279	-7.42451	4.52515e-13	4.14051e-12	19.0506
KEGG_LEUKOCYTE_TRANSENDOTHELIAL_MIGRATION	-0.141246	0.00167273	-7.38374	5.97844e-13	5.20978e-12	18.7789
KEGG_HYPERTROPHIC_CARDIOMYOPATHY_HCM	-0.17955	-0.0256907	-7.28075	1.20159e-12	9.99507e-12	18.098
KEGG_VASCULAR_SMOOTH_MUSCLE_CONTRACTION	-0.11585	-0.0100544	-7.11747	3.57713e-12	2.84615e-11	17.0346
KEGG_AXON_GUIDANCE	-0.117743	-0.0175134	-7.1079	3.81119e-12	2.90604e-11	16.9728
KEGG_TYPE_II_DIABETES_MELLITUS	-0.112185	0.00109746	-7.09175	4.24027e-12	3.10388e-11	16.8688
KEGG_LONG_TERM_DEPRESSION	-0.100167	-0.0283756	-6.88287	1.65716e-11	1.16639e-10	15.5415
KEGG_PATHOGENIC_ESCHERICHIA_COLI_INFECTION	-0.130714	-0.0274716	-6.81532	2.55721e-11	1.71944e-10	15.1194
KEGG_DILATED_CARDIOMYOPATHY	-0.163974	-0.0204252	-6.81089	2.63084e-11	1.71944e-10	15.0918
KEGG_RENAL_CELL_CARCINOMA	-0.12435	-0.00351317	-6.71457	4.85327e-11	3.06258e-10	14.4962
KEGG_LEISHMANIA_INFECTION	-0.179543	0.00924103	-6.55161	1.34585e-10	8.20967e-10	13.5049
KEGG_TOLL_LIKE_RECEPTOR_SIGNALING_PATHWAY	-0.123025	0.0099847	-6.35477	4.49086e-10	2.65106e-09	12.335
KEGG_COMPLEMENT_AND_COAGULATION_CASCADES	-0.147193	0.000633149	-6.22233	9.93308e-10	5.68048e-09	11.5652
KEGG_PROPANOATE_METABOLISM	0.141492	0.00900224	6.17644	1.30368e-09	7.18574e-09	11.3017
KEGG_APOPTOSIS	-0.105054	0.016798	-6.13138	1.69982e-09	8.64073e-09	11.0447
KEGG_GLYCOSAMINOGLYCAN_BIOSYNTHESIS_KERATAN_SULFATE	-0.153417	0.0206045	-5.92103	5.74365e-09	2.76602e-08	9.86626
KEGG_SPHINGOLIPID_METABOLISM	-0.104577	-0.0428491	-5.87762	7.35213e-09	3.3636e-08	9.62755
KEGG_GLYCOSPHINGOLIPID_BIOSYNTHESIS_GANGLIO_SERIES	-0.157469	0.0283037	-5.85091	8.55148e-09	3.81688e-08	9.48149
KEGG_BASE_EXCISION_REPAIR	0.158313	0.0499347	5.7491	1.51363e-08	6.59508e-08	8.92989
KEGG_ADHERENS_JUNCTION	-0.118539	-0.00835703	-5.58449	3.74357e-08	1.59319e-07	8.05618
KEGG_LINOLEIC_ACID_METABOLISM	0.154864	-0.0484248	5.52461	5.17557e-08	2.15256e-07	7.74399
KEGG_VALINE_LEUCINE_AND_ISOLEUCINE_DEGRADATION	0.123342	0.0186147	5.41836	9.13001e-08	3.71287e-07	7.19737
KEGG_HISTIDINE_METABOLISM	0.107522	0.000494069	5.32116	1.52225e-07	6.05591e-07	6.70561
KEGG_DRUG_METABOLISM_CYTOCHROME_P450	0.145017	0.00142967	5.26719	2.01512e-07	7.84609e-07	6.43602
KEGG_RETINOL_METABOLISM	0.127033	-0.0215968	5.23501	2.37928e-07	8.98876e-07	6.27643
KEGG_OXIDATIVE_PHOSPHORYLATION	0.148752	-0.0186307	5.23277	2.40683e-07	8.98876e-07	6.26537
KEGG_FATTY_ACID_METABOLISM	0.102179	0.00444429	5.05506	5.9286e-07	2.00914e-06	5.40045
KEGG_PARKINSONS_DISEASE	0.137426	-0.00616803	4.97548	8.80212e-07	2.92871e-06	5.02189
KEGG_METABOLISM_OF_XENOBIOTICS_BY_CYTOCHROME_P450	0.142789	-0.00298974	4.84843	1.63612e-06	5.34662e-06	4.42892
KEGG_GLYCINE_SERINE_AND_THREONINE_METABOLISM	0.100981	0.0360141	4.79401	2.12488e-06	6.82197e-06	4.17922
KEGG_GLYCOSAMINOGLYCAN_DEGRADATION	-0.116288	-0.0162569	-4.55418	6.52636e-06	1.95791e-05	3.10967
KEGG_STEROID_HORMONE_BIOSYNTHESIS	0.113004	-0.00677004	4.48654	8.87748e-06	2.62029e-05	2.81718
KEGG_CELL_ADHESION_MOLECULES_CAMS	-0.10813	0.013296	-4.37941	1.43361e-05	3.91569e-05	2.36226
KEGG_ASCORBATE_AND_ALDARATE_METABOLISM	0.115917	0.0190141	3.82927	0.000143833	0.000346336	0.188315
KEGG_AMINOACYL_TRNA_BIOSYNTHESIS	0.101996	0.027943	3.76164	0.000187552	0.000434455	-0.0599821
KEGG_TERPENOID_BACKBONE_BIOSYNTHESIS	0.110947	-0.0523548	3.53408	0.000444843	0.000925071	-0.864511
KEGG_DNA_REPLICATION	0.123262	0.0567145	3.49237	0.000518591	0.00105606	-1.00679
KEGG_HOMOLOGOUS_RECOMBINATION	0.100347	0.047013	3.31819	0.000968043	0.00178941	-1.5835
KEGG_SYSTEMIC_LUPUS_ERYTHEMATOSUS	-0.105017	0.0124435	-3.07632	0.00220359	0.00384055	-2.33729
KEGG_RIBOSOME	0.119625	-0.0040496	2.86808	0.00429368	0.00683256	-2.94216

## Sheet: Table S3
id	logFC	AveExpr	t	P.Value	adj.P.Val	B
KEGG_BASE_EXCISION_REPAIR	-0.269283	-0.00350791	-11.1644	2.23652e-26	4.09284e-24	49.0908
KEGG_LONG_TERM_DEPRESSION	0.14133	-0.00591158	10.6996	1.57711e-24	1.44305e-22	44.9114
KEGG_ETHER_LIPID_METABOLISM	0.167964	0.024267	10.641	2.67436e-24	1.63136e-22	44.393
KEGG_SPHINGOLIPID_METABOLISM	0.164548	-0.0127558	10.2301	1.02775e-22	4.70197e-21	40.8119
KEGG_GNRH_SIGNALING_PATHWAY	0.123695	0.00104985	9.96606	1.01863e-21	3.72817e-20	38.5619
KEGG_DNA_REPLICATION	-0.285932	-0.0146946	-9.11649	1.22332e-18	3.73112e-17	31.6126
KEGG_SPLICEOSOME	-0.206001	-0.0116668	-8.98095	3.63512e-18	9.50324e-17	30.5463
KEGG_BLADDER_CANCER	0.13208	-0.00678821	8.88446	7.83516e-18	1.79229e-16	29.7946
KEGG_GAP_JUNCTION	0.140265	-0.0136472	8.82711	1.23313e-17	2.50736e-16	29.3508
KEGG_MISMATCH_REPAIR	-0.245184	-0.0162323	-8.51288	1.42349e-16	2.60499e-15	26.958
KEGG_HOMOLOGOUS_RECOMBINATION	-0.227436	-0.00903451	-8.47015	1.97498e-16	3.25909e-15	26.6379
KEGG_OLFACTORY_TRANSDUCTION	0.160348	0.0441234	8.45983	2.13711e-16	3.25909e-15	26.5608
KEGG_GLYCINE_SERINE_AND_THREONINE_METABOLISM	-0.164608	0.00472104	-8.41201	3.07748e-16	4.33214e-15	26.2043
KEGG_AXON_GUIDANCE	0.122895	-0.00799915	8.34723	5.03106e-16	6.57631e-15	25.7239
KEGG_LYSINE_DEGRADATION	-0.143138	-0.00788956	-8.32687	5.86828e-16	7.1593e-15	25.5735
KEGG_NOD_LIKE_RECEPTOR_SIGNALING_PATHWAY	0.15182	-0.0397818	8.24842	1.05886e-15	1.21107e-14	24.9967
KEGG_RNA_DEGRADATION	-0.157757	-0.0113541	-8.14394	2.30863e-15	2.48517e-14	24.2353
KEGG_PATHOGENIC_ESCHERICHIA_COLI_INFECTION	0.142497	-0.0145403	8.08443	3.58656e-15	3.64634e-14	23.8051
KEGG_ENDOCYTOSIS	0.100855	-0.00340061	7.98137	7.64579e-15	7.36411e-14	23.066
KEGG_VALINE_LEUCINE_AND_ISOLEUCINE_DEGRADATION	-0.155028	-0.00162341	-7.85819	1.87106e-14	1.71202e-13	22.1926
KEGG_ARRHYTHMOGENIC_RIGHT_VENTRICULAR_CARDIOMYOPATHY_ARVC	0.15331	-0.0196764	7.56435	1.51387e-13	1.31923e-12	20.1537
KEGG_ALPHA_LINOLENIC_ACID_METABOLISM	0.180121	0.0371758	7.3545	6.48271e-13	5.39244e-12	18.7366
KEGG_HEDGEHOG_SIGNALING_PATHWAY	0.119176	0.00150713	7.16428	2.35553e-12	1.79609e-11	17.4807
KEGG_SELENOAMINO_ACID_METABOLISM	-0.138036	-0.0132229	-6.94809	9.8751e-12	6.95055e-11	16.0869
KEGG_HUNTINGTONS_DISEASE	-0.127338	-0.01015	-6.93362	1.08555e-11	7.35764e-11	15.9949
KEGG_ECM_RECEPTOR_INTERACTION	0.172248	-0.0371382	6.60458	8.94535e-11	5.64482e-10	13.9471
KEGG_AMINOACYL_TRNA_BIOSYNTHESIS	-0.166352	-0.00369936	-6.57472	1.07871e-10	6.47129e-10	13.7655
KEGG_NEUROACTIVE_LIGAND_RECEPTOR_INTERACTION	0.100162	0.0135699	6.49235	1.80155e-10	1.03026e-09	13.2682
KEGG_TGF_BETA_SIGNALING_PATHWAY	0.104015	-0.0166873	6.44394	2.42933e-10	1.34717e-09	12.9784
KEGG_ONE_CARBON_POOL_BY_FOLATE	-0.152011	0.0013079	-6.3357	4.70843e-10	2.53425e-09	12.3373
KEGG_FOCAL_ADHESION	0.131153	-0.0336561	6.32004	5.1774e-10	2.70704e-09	12.2454
KEGG_BETA_ALANINE_METABOLISM	-0.108165	0.00616452	-6.19729	1.08264e-09	5.37465e-09	11.5314
KEGG_RENIN_ANGIOTENSIN_SYSTEM	0.147593	-0.030984	6.16871	1.28324e-09	6.17979e-09	11.3669
KEGG_HYPERTROPHIC_CARDIOMYOPATHY_HCM	0.136282	-0.0311567	6.14761	1.45428e-09	6.82394e-09	11.2459
KEGG_NUCLEOTIDE_EXCISION_REPAIR	-0.139518	-0.00820264	-6.05395	2.52321e-09	1.12621e-08	10.7132
KEGG_TRYPTOPHAN_METABOLISM	-0.102708	-0.00390484	-5.85713	7.84915e-09	3.19199e-08	9.61731
KEGG_PROPANOATE_METABOLISM	-0.11758	0.00933049	-5.83448	8.92593e-09	3.55097e-08	9.49328
KEGG_DILATED_CARDIOMYOPATHY	0.124179	-0.0255269	5.80817	1.03584e-08	3.94916e-08	9.34971
KEGG_CELL_CYCLE	-0.116173	-0.013867	-5.58758	3.52822e-08	1.31768e-07	8.16886
KEGG_NITROGEN_METABOLISM	0.103983	0.0208831	5.36229	1.1835e-07	4.16502e-07	7.00529
KEGG_STEROID_BIOSYNTHESIS	0.130124	0.030828	5.11027	4.35862e-07	1.42434e-06	5.75521
KEGG_LINOLEIC_ACID_METABOLISM	0.136584	0.055579	5.04095	6.18037e-07	1.98422e-06	5.421
KEGG_BUTANOATE_METABOLISM	-0.101344	0.0229932	-4.88217	1.35445e-06	3.99781e-06	4.67125
KEGG_NON_HOMOLOGOUS_END_JOINING	-0.118003	-0.00564153	-4.63644	4.37262e-06	1.19431e-05	3.55461
KEGG_PARKINSONS_DISEASE	-0.111953	-0.00497078	-4.43349	1.10699e-05	2.8136e-05	2.67281
KEGG_OTHER_GLYCAN_DEGRADATION	-0.110276	-0.0340532	-4.00618	6.96469e-05	0.000161334	0.937325
KEGG_PRIMARY_IMMUNODEFICIENCY	-0.120319	-0.00416513	-3.69553	0.000239973	0.000487945	-0.219828
KEGG_RIBOSOME	-0.138191	-0.0189245	-3.58667	0.000362852	0.000706403	-0.604264

## Sheet: Table S4
id	logFC	AveExpr	t	P.Value	adj.P.Val	B
KEGG_PRION_DISEASES	-0.176678	0.0396572	-8.94997	1.29441e-17	1.6332e-15	29.3397
KEGG_ETHER_LIPID_METABOLISM	0.175601	0.0509087	8.90742	1.78492e-17	1.6332e-15	29.0272
KEGG_COLORECTAL_CANCER	-0.158189	-0.0185146	-8.77207	4.92734e-17	3.00568e-15	28.0397
KEGG_LINOLEIC_ACID_METABOLISM	0.291447	0.0131622	8.6334	1.37977e-16	6.31245e-15	27.0387
KEGG_OLFACTORY_TRANSDUCTION	0.198784	0.056131	8.49557	3.79835e-16	1.3902e-14	26.0545
KEGG_ALPHA_LINOLENIC_ACID_METABOLISM	0.258324	0.0355648	8.42061	6.55819e-16	2.00025e-14	25.5238
KEGG_RETINOL_METABOLISM	0.214993	0.0152238	7.91944	2.31964e-14	6.06421e-13	22.0618
KEGG_APOPTOSIS	-0.135527	0.0103957	-7.72604	8.81564e-14	2.01658e-12	20.7669
KEGG_SMALL_CELL_LUNG_CANCER	-0.145631	0.0221738	-7.59861	2.09739e-13	4.26469e-12	19.9267
KEGG_STEROID_BIOSYNTHESIS	0.21163	0.0188829	7.01251	9.86488e-12	1.80527e-10	16.1991
KEGG_GLYCOSPHINGOLIPID_BIOSYNTHESIS_GANGLIO_SERIES	-0.203796	0.0183367	-6.55937	1.65208e-10	2.74846e-09	13.4777
KEGG_PROSTATE_CANCER	-0.111499	0.0152204	-6.40528	4.16823e-10	6.35655e-09	12.5855
KEGG_GLYCOSAMINOGLYCAN_BIOSYNTHESIS_KERATAN_SULFATE	-0.169522	0.0274097	-6.19657	1.4208e-09	2.00006e-08	11.4047
KEGG_TERPENOID_BACKBONE_BIOSYNTHESIS	0.207301	-0.00908427	5.97252	5.1154e-09	6.68655e-08	10.1731
KEGG_GLYCOSAMINOGLYCAN_BIOSYNTHESIS_CHONDROITIN_SULFATE	-0.191587	0.0495607	-5.75763	1.68751e-08	1.81655e-07	9.02751
KEGG_GLYCOSPHINGOLIPID_BIOSYNTHESIS_GLOBO_SERIES	-0.155793	-0.0149585	-5.74574	1.80094e-08	1.83095e-07	8.96513
KEGG_OTHER_GLYCAN_DEGRADATION	-0.181846	-0.0228543	-5.38875	1.20654e-07	1.16209e-06	7.14445
KEGG_N_GLYCAN_BIOSYNTHESIS	-0.130568	-0.0183808	-5.37484	1.29681e-07	1.18658e-06	7.07551
KEGG_B_CELL_RECEPTOR_SIGNALING_PATHWAY	-0.115743	0.00592701	-5.35035	1.47183e-07	1.2826e-06	6.95458
KEGG_ARACHIDONIC_ACID_METABOLISM	0.141409	0.0100718	5.30349	1.8729e-07	1.53408e-06	6.72447
KEGG_STEROID_HORMONE_BIOSYNTHESIS	0.14612	0.000308383	5.29782	1.92808e-07	1.53408e-06	6.69674
KEGG_TOLL_LIKE_RECEPTOR_SIGNALING_PATHWAY	-0.108306	0.0311631	-5.18828	3.36217e-07	2.56366e-06	6.16627
KEGG_CHEMOKINE_SIGNALING_PATHWAY	-0.116446	0.0488006	-5.12091	4.71124e-07	3.44863e-06	5.84476
KEGG_LEISHMANIA_INFECTION	-0.144128	0.0480763	-4.86606	1.63356e-06	1.06765e-05	4.6622
KEGG_HEMATOPOIETIC_CELL_LINEAGE	-0.143757	0.0652351	-4.68086	3.90237e-06	2.38045e-05	3.83653
KEGG_PROXIMAL_TUBULE_BICARBONATE_RECLAMATION	0.102857	0.0138038	4.62877	4.9606e-06	2.75088e-05	3.60945
KEGG_PROTEIN_EXPORT	-0.135306	-0.0376211	-4.50291	8.77695e-06	4.72407e-05	3.0702
KEGG_MISMATCH_REPAIR	-0.150761	-0.100632	-4.47043	1.01479e-05	5.1585e-05	2.93323
KEGG_DNA_REPLICATION	-0.16267	-0.118788	-4.44642	1.12909e-05	5.53848e-05	2.83255
KEGG_CYTOKINE_CYTOKINE_RECEPTOR_INTERACTION	-0.110885	0.0676081	-4.44227	1.15007e-05	5.53848e-05	2.81519
KEGG_RIBOFLAVIN_METABOLISM	-0.101974	-0.030182	-4.40312	1.36708e-05	6.41476e-05	2.65224
KEGG_DRUG_METABOLISM_CYTOCHROME_P450	0.128753	-0.0229168	4.2238	2.96937e-05	0.000123499	1.92256
KEGG_SPLICEOSOME	-0.117237	-0.0866435	-4.05857	5.92639e-05	0.000230751	1.27479
KEGG_METABOLISM_OF_XENOBIOTICS_BY_CYTOCHROME_P450	0.129569	-0.0253727	4.0067	7.32751e-05	0.00027366	1.07635
KEGG_HOMOLOGOUS_RECOMBINATION	-0.127089	-0.0928245	-3.8732	0.000125218	0.000432355	0.576445
KEGG_PRIMARY_BILE_ACID_BIOSYNTHESIS	0.108209	0.00780419	3.71858	0.000228571	0.000746936	0.017125
KEGG_BASE_EXCISION_REPAIR	-0.11097	-0.119744	-3.69132	0.000253619	0.00080021	-0.0792735
KEGG_SYSTEMIC_LUPUS_ERYTHEMATOSUS	-0.109997	0.0205409	-2.94588	0.00340632	0.00831142	-2.45554
KEGG_INTESTINAL_IMMUNE_NETWORK_FOR_IGA_PRODUCTION	-0.110383	-0.00408781	-2.87906	0.00420013	0.00960781	-2.64369

## Sheet: Table S5
ID	Description	GeneRatio	BgRatio	pvalue	p.adjust	qvalue	geneID	Count
hsa04380	Osteoclast differentiation	31/977	128/8105	9.03992e-05	0.0150518	0.0133653	IL1B/FCGR3B/IL1A/LILRB3/NCF2/LCP2/TGFBR2/FYN/SIRPB1/OSCAR/AKT3/TNFSF11/SPI1/NFKB2/CSF1/IFNAR2/TYROBP/CSF1R/IKBKB/PPP3CB/LILRB4/FCGR2B/NFKB1/RELB/SOCS1/CAMK4/PIK3R3/MAP2K6/NFATC1/MAPK8/NCF4	31
hsa05133	Pertussis	21/977	76/8105	0.000173982	0.0150518	0.0133653	IL6/IL1B/CXCL5/IL1A/ITGA5/TLR4/GNAI2/CD14/CALML3/ITGAM/NFKB1/C3/CALML5/RHOA/C5/IRF3/ITGB2/MAPK8/IL23A/CALML4/NOS2	21
hsa05167	Kaposi sarcoma-associated herpesvirus infection	41/977	193/8105	0.000176288	0.0150518	0.0133653	IL6/CXCL2/CSF2/ANGPT2/ICAM1/CCR1/NRAS/FGF2/HCK/GNG10/CALML3/AKT3/GNG2/CD86/IFNAR2/ITPR1/PREX1/PIK3R5/IKBKB/PPP3CB/NFKB1/C3/CALML5/GNB1/MAPKAPK2/IRF3/RPS27A/MICB/UBA52/PIK3R3/MAP2K6/TCF7L1/TRAF3/PIK3CG/NFATC1/MAPK8/TCF7/GABARAPL1/CASP9/CALML4/FAS	41
hsa04668	TNF signaling pathway	27/977	112/8105	0.000273344	0.0150518	0.0133653	IL6/IL1B/CXCL2/CXCL5/CSF2/MMP3/ICAM1/EDN1/TNFRSF1B/CREB3L4/MAP2K3/TRAF1/AKT3/CSF1/ATF2/IKBKB/VCAM1/NOD2/NFKB1/IL18R1/BIRC3/PIK3R3/MAP2K6/TRAF3/MAPK8/ITCH/FAS	27
hsa04015	Rap1 signaling pathway	43/977	210/8105	0.000291203	0.0150518	0.0133653	THBS1/ANGPT2/LCP2/GNAI2/NRAS/FGF2/ACTB/LPAR1/PDGFC/MAP2K3/CALML3/AKT3/MRAS/FGFR1/NGF/RASGRP3/ITGAM/CSF1/RAPGEF1/ARAP3/CSF1R/TLN1/CALML5/ADORA2A/ANGPT1/LAT/RHOA/SKAP1/RAP1A/PARD6A/LPAR2/PRKCA/FGF1/ITGB2/RAC2/INSR/PIK3R3/LPAR5/MAP2K6/SIPA1L1/ID1/PDGFD/CALML4	43
hsa04664	Fc epsilon RI signaling pathway	19/977	68/8105	0.000299273	0.0150518	0.0133653	CSF2/LCP2/NRAS/FYN/ALOX5AP/MAP2K3/AKT3/FCER1G/LAT/ALOX5/PLA2G4D/PRKCA/PLA2G4F/RAC2/PIK3R3/MAP2K6/PLA2G4B/MAPK8/PLA2G4E	19
hsa05202	Transcriptional misregulation in cancer	40/977	192/8105	0.000323197	0.0150518	0.0133653	IL6/CSF2/NR4A3/BCL2A1/MMP3/PLAU/GADD45B/TGFBR2/NFKBIZ/CD14/TRAF1/RARA/HMGA2/DDB2/NUPR1/ITGAM/SPI1/CEBPA/CD86/MEIS1/ETV5/FLI1/CSF1R/SP1/RXRB/TMPRSS2/TAF15/NFKB1/ASPSCR1/FUT8/CDKN2C/TLX3/BIRC3/PBX1/BCL11B/JUP/NCOR1/FUS/PRCC/SLC45A3	40
hsa05418	Fluid shear stress and atherosclerosis	31/977	139/8105	0.000440059	0.0179324	0.0159232	IL1B/IL1A/ICAM1/NCF2/MMP2/PECAM1/EDN1/ACTB/DUSP1/CALML3/AKT3/KLF2/ACVR2A/IKBKB/VCAM1/NFKB1/ARHGEF2/CALML5/GSTM4/MAP2K5/TRPV4/RHOA/SUMO2/HSP90AB1/RAC2/PIK3R3/MAP2K6/MAPK8/HSP90B1/CALML4/GSTA1	31
hsa04010	MAPK signaling pathway	55/977	294/8105	0.000508129	0.0184056	0.0163433	IL1B/ANGPT2/IL1A/MAP4K4/NRAS/FGF2/PDGFC/GADD45B/TGFBR2/MAP2K3/DUSP1/CD14/ERBB2/AKT3/MRAS/FGFR1/ARRB2/NGF/RASGRP3/DUSP2/NFKB2/CSF1/ATF2/CSF1R/FLT3LG/MAP3K12/CACNA1F/IKBKB/PPP3CB/STK4/NFKB1/RELB/MAP2K5/ANGPT1/PLA2G4D/MAPKAPK2/MAP3K13/RAP1A/MAP3K3/PRKCA/FGF1/PLA2G4F/RAC2/CACNA1E/INSR/RPS6KA3/DUSP7/MAP2K6/PLA2G4B/ELK1/NFATC1/MAPK8/PLA2G4E/PDGFD/FAS	55
hsa03030	DNA replication	12/977	36/8105	0.000692562	0.0212796	0.0188954	RPA2/LIG1/MCM2/MCM5/POLA2/POLD1/RFC4/RNASEH2A/MCM3/POLE/MCM6/POLE2	12
hsa05221	Acute myeloid leukemia	18/977	67/8105	0.000718025	0.0212796	0.0188954	CSF2/BCL2A1/NRAS/CD14/RARA/AKT3/ITGAM/SPI1/CEBPA/PPARD/CSF1R/IKBKB/PIM1/NFKB1/JUP/PIK3R3/TCF7L1/TCF7	18
hsa05417	Lipid and atherosclerosis	41/977	215/8105	0.00174125	0.0473041	0.0420039	IL6/IL1B/CXCL2/MMP3/ICAM1/NCF2/TLR4/NRAS/MAP2K3/CD14/CALML3/AKT3/AGER/ITPR1/TNFRSF10B/IKBKB/VCAM1/RXRB/PPP3CB/NFKB1/CALML5/POU2F2/POU2F3/SELP/RHOA/RAP1A/IRF3/PRKCA/HSP90AB1/PIK3R3/MAP2K6/TRAF3/NFATC1/MAPK8/NCF4/HSP90B1/MIB1/CASP9/CYBB/CALML4/FAS	41
hsa04670	Leukocyte transendothelial migration	25/977	114/8105	0.00195096	0.048924	0.0434424	ICAM1/NCF2/MMP2/PECAM1/GNAI2/ACTB/VCL/MSN/RHOH/PXN/ITGAM/VCAM1/ITGA4/CD99L2/CXCR4/CLDN14/RHOA/RAP1A/PRKCA/ITGB2/RAC2/PIK3R3/CLDN15/NCF4/CYBB	25
hsa05134	Legionellosis	15/977	57/8105	0.0024325	0.0562642	0.0499602	IL6/IL1B/CXCL2/TLR4/CD14/NLRC4/ITGAM/NFKB2/NFKB1/C3/SEC22B/ARF1/ITGB2/BNIP3/CASP9	15
hsa04625	C-type lectin receptor signaling pathway	23/977	104/8105	0.00258884	0.0562642	0.0499602	IL6/IL1B/PLK3/EGR3/NRAS/CALML3/AKT3/MRAS/FCER1G/NFKB2/ITPR1/IKBKB/PPP3CB/NFKB1/RELB/CALML5/RHOA/MAPKAPK2/PIK3R3/NFATC1/MAPK8/IL23A/CALML4	23

## Sheet: Table S6
ARGgene	lncRNA	cor	pvalue
GPX4	OSER1-DT	0.650555	1.0689e-59
TIRAP	AP001318.2	0.642713	7.28168e-58
GSDMD	AL021707.6	0.629066	8.47351e-55
GPX4	AC073896.4	0.608193	2.14698e-50
GSDMA	AC115522.1	0.598552	1.80909e-48
GPX4	AL392172.1	0.593723	1.57675e-47
GSDMD	SNHG25	0.589498	1.01735e-46
GPX4	RAB11B-AS1	0.578727	1.04439e-44
AIM2	USP30-AS1	0.578202	1.30292e-44
SCAF11	AC073046.1	0.572623	1.3358e-43
GPX4	LINC01315	0.571651	1.99476e-43
GPX4	PXN-AS1	0.5706	3.07267e-43
AIM2	HCP5	0.569078	5.73008e-43
TIRAP	AP003486.1	0.567304	1.17971e-42
GPX4	AC016876.1	0.566735	1.48563e-42
GSDMD	AC008608.2	0.56566	2.29418e-42
GPX4	AC036176.1	0.560283	1.96976e-41
GPX4	CH17-340M24.3	0.559761	2.4215e-41
SCAF11	AC108010.1	0.555739	1.17541e-40
GPX4	AC012615.1	0.553354	2.96971e-40
GPX4	AC090425.1	0.549497	1.30846e-39
GPX4	AC084033.3	0.543521	1.25422e-38
GSDMD	AP001505.1	0.541723	2.45377e-38
SCAF11	AC108449.2	0.538461	8.20566e-38
GPX4	MAPKAPK5-AS1	0.53693	1.43969e-37
GSDMD	AC055822.1	0.535775	2.1958e-37
GSDMD	ARRDC1-AS1	0.535248	2.66136e-37
GPX4	AC124016.2	0.532497	7.21261e-37
GPX4	DLG5-AS1	0.529637	2.01467e-36
GPX4	AC024060.1	0.525597	8.45559e-36
CASP9	AC104794.2	0.524895	1.08275e-35
GPX4	FOXD3-AS1	0.52392	1.52459e-35
GSDMD	AC012510.1	0.52091	4.35835e-35
GPX4	AC106900.2	0.520013	5.94732e-35
GPX4	AC067838.1	0.519322	7.55217e-35
GSDMD	SNHG6	0.517985	1.19747e-34
GSDMD	AC011445.2	0.514481	3.96621e-34
CASP9	AC005332.6	0.512702	7.24761e-34
GSDMD	LINC01871	0.510487	1.52762e-33
IL6	IER3-AS1	0.509792	1.92836e-33
CASP9	MIR9-3HG	0.509402	2.19709e-33
GSDMD	SNHG8	0.507662	3.92316e-33
NLRP1	AC004148.2	0.507069	4.776e-33
PYCARD	U62317.4	0.506767	5.27891e-33
GSDMD	AC138696.2	0.504365	1.1663e-32
GPX4	AL035461.2	0.504118	1.26483e-32
SCAF11	AC024075.1	0.502768	1.9686e-32
GSDMD	AC004687.1	0.502099	2.44973e-32
GPX4	AC084824.5	0.501562	2.91792e-32
GSDMD	LINC00623	0.499624	5.47384e-32
GPX4	AC020765.2	0.49809	8.97974e-32
GPX4	AC073896.2	0.496196	1.64913e-31
GPX4	AC108673.3	0.493773	3.56907e-31
GSDMD	AC103691.1	0.492256	5.7707e-31
GPX4	AL035071.1	0.489565	1.34452e-30
GSDMD	LINC01023	0.48823	2.04038e-30
GPX4	URB1-AS1	0.486883	3.10163e-30
AIM2	PSMB8-AS1	0.482169	1.32381e-29
GSDME	MIR31HG	0.48203	1.38128e-29
GPX4	AC133552.5	0.481887	1.44307e-29
GPX4	EPB41L4A-AS1	0.481176	1.79212e-29
GSDME	LINC00941	0.481039	1.86822e-29
GSDMD	AP003352.1	0.480032	2.53741e-29
CASP6	PTOV1-AS1	0.479884	2.65378e-29
GPX4	AL117332.1	0.47884	3.63936e-29
GSDMD	LINC02195	0.478639	3.86809e-29
CASP9	TNRC6C-AS1	0.477764	5.0355e-29
GPX4	YTHDF3-AS1	0.476556	7.23756e-29
GPX4	MAFG-DT	0.476214	8.0196e-29
GPX4	TMEM161B-AS1	0.475549	9.78529e-29
GPX4	RPARP-AS1	0.475071	1.12883e-28
CASP9	LNCTAM34A	0.47452	1.33018e-28
GSDMD	AC008610.1	0.473833	1.63165e-28
GPX4	AC106897.1	0.473335	1.89209e-28
AIM2	U62317.2	0.472987	2.09762e-28
GPX4	AC097468.3	0.472383	2.50868e-28
GPX4	AF131215.6	0.468867	7.05304e-28
GSDMD	ZSCAN16-AS1	0.468439	7.99329e-28
GPX4	AL451165.2	0.468243	8.46505e-28
CASP6	FAM111A-DT	0.467765	9.72999e-28
GSDMD	AC026979.2	0.46601	1.62002e-27
GPX4	DNAJC9-AS1	0.465703	1.77044e-27
GSDMD	MHENCR	0.464307	2.64877e-27
GPX4	AC019131.2	0.462681	4.22552e-27
NOD1	LINC00265	0.461277	6.31291e-27
CASP9	DTX2P1-UPK3BP1-PMS2P11	0.461244	6.37275e-27
CASP9	FLJ37453	0.460876	7.0761e-27
GSDMD	AL355353.1	0.460392	8.12069e-27
GPX4	AC100810.1	0.460162	8.67023e-27
SCAF11	AC092611.2	0.459537	1.03523e-26
TIRAP	AC008764.2	0.458751	1.29329e-26
GPX4	AC009005.1	0.457708	1.73594e-26
GSDME	LINC02454	0.45743	1.87762e-26
GSDMD	AL138724.1	0.456971	2.13646e-26
CASP6	THAP9-AS1	0.456768	2.26198e-26
GPX4	AC069281.2	0.456237	2.62542e-26
GPX4	KMT2E-AS1	0.455666	3.08089e-26
GPX4	SPINT1-AS1	0.454825	3.89752e-26
GSDMD	AC009065.4	0.454648	4.09409e-26
GSDMA	AL034376.1	0.454496	4.27216e-26
GPX4	TRIM52-AS1	0.454224	4.60858e-26
GSDMD	SNHG7	0.454108	4.75958e-26
PRKACA	ZNF710-AS1	0.452693	7.0519e-26
GSDMD	AC060766.4	0.452323	7.81356e-26
GPX4	AC008443.4	0.451435	9.98753e-26
TIRAP	CTBP1-DT	0.451075	1.10283e-25
GSDMD	AL162274.2	0.450219	1.39609e-25
GPX4	LINC01006	0.450185	1.40918e-25
GPX4	LINC00339	0.448765	2.07988e-25
TIRAP	AL450326.1	0.447817	2.69493e-25
GPX4	AC109322.1	0.447244	3.15037e-25
GPX4	AC139530.1	0.447058	3.31351e-25
CASP9	AC079610.2	0.446107	4.29062e-25
GSDMA	AC129492.1	0.444933	5.89484e-25
GPX4	AC006449.6	0.44469	6.29631e-25
AIM2	U62317.1	0.444536	6.56281e-25
GPX4	AC106795.2	0.444138	7.30586e-25
CASP6	FGD5-AS1	0.443712	8.19315e-25
NLRP3	SMIM25	0.442916	1.01471e-24
GPX4	AP000254.1	0.442705	1.07391e-24
GPX4	AC090617.5	0.441898	1.33308e-24
SCAF11	OIP5-AS1	0.441198	1.60698e-24
GPX4	AC010503.4	0.440986	1.70037e-24
GPX4	AC105942.1	0.439393	2.59733e-24
GPX4	AC109347.2	0.43741	4.388e-24
GPX4	MYLK-AS1	0.436856	5.0766e-24
GPX4	AC011374.2	0.435316	7.60303e-24
GSDMD	AL121832.2	0.435315	7.60575e-24
GPX4	MINCR	0.434998	8.26336e-24
CASP9	APTR	0.434985	8.29083e-24
CASP9	AC016205.1	0.434625	9.10793e-24
GSDMD	AC010969.2	0.433879	1.10661e-23
GSDMD	FLJ20021	0.433746	1.14535e-23
CASP9	AC096992.2	0.43354	1.20867e-23
GSDMA	AC083841.1	0.433409	1.25037e-23
GSDMA	LINC02560	0.432918	1.42047e-23
GPX4	AC024896.1	0.432291	1.67154e-23
CASP9	AC012467.2	0.432151	1.73297e-23
GSDMD	SNHG15	0.432129	1.74286e-23
CASP9	AC104825.1	0.430578	2.60145e-23
CASP6	THUMPD3-AS1	0.430376	2.74051e-23
CASP6	LINC00909	0.429385	3.53539e-23
GSDMD	AC015912.3	0.429248	3.66184e-23
NLRP1	AL365330.1	0.428753	4.15699e-23
GPX4	AL157394.1	0.428473	4.46575e-23
GSDME	HS1BP3-IT1	0.428364	4.59172e-23
PYCARD	AL049840.4	0.427182	6.20856e-23
GPX4	CRNDE	0.42706	6.40446e-23
GPX4	AC080013.6	0.4269	6.67031e-23
GSDMD	AC132192.2	0.426563	7.2682e-23
NOD2	LINC01214	0.426076	8.22343e-23
NLRP1	PTOV1-AS2	0.425816	8.7858e-23
GPX4	SNHG11	0.425033	1.07103e-22
CASP9	ASB16-AS1	0.42484	1.12462e-22
GPX4	AC005261.3	0.424338	1.27649e-22
GPX4	AC002398.1	0.424298	1.2895e-22
CASP9	SREBF2-AS1	0.423224	1.68982e-22
GPX4	AL391069.2	0.422534	2.00941e-22
GPX4	AC007114.1	0.422216	2.17615e-22
GSDMD	AP006621.3	0.421675	2.49211e-22
GPX4	LINC00847	0.421301	2.73575e-22
GPX4	AC027644.3	0.420937	2.99629e-22
AIM2	AC007991.2	0.420914	3.01314e-22
PYCARD	AC104031.1	0.420588	3.2683e-22
GPX4	AL591895.1	0.42003	3.75567e-22
CASP9	AC005332.5	0.419619	4.15899e-22
GSDMD	CYTOR	0.419141	4.68327e-22
GSDMD	ZFAS1	0.418552	5.41818e-22
PYCARD	MIR200CHG	0.417702	6.68545e-22
GPX4	AC084036.1	0.416391	9.23105e-22
CASP3	AC091057.1	0.416355	9.3137e-22
GPX4	AC010542.5	0.416329	9.37256e-22
GSDMD	AC147651.3	0.416277	9.49336e-22
CASP9	AC020907.1	0.415943	1.03041e-21
GPX4	AC091982.3	0.415831	1.0591e-21
GPX4	AC040169.1	0.415484	1.15314e-21
PYCARD	LIPE-AS1	0.415345	1.19304e-21
GPX4	AC120053.1	0.415289	1.20942e-21
CASP9	AC005332.3	0.41488	1.3368e-21
PYCARD	AC034213.1	0.414245	1.5609e-21
NLRP1	AL109811.3	0.413629	1.81354e-21
GSDMA	LINC01527	0.412436	2.42302e-21
CASP9	AC139795.2	0.412343	2.47835e-21
CASP9	EP300-AS1	0.411868	2.78069e-21
CASP3	UBL7-AS1	0.411782	2.83885e-21
NOD2	LINC01094	0.411321	3.17391e-21
CASP3	AC125257.1	0.411083	3.3614e-21
GSDMD	MIR4435-2HG	0.410882	3.52868e-21
GPX4	AP002360.1	0.410621	3.75782e-21
CASP9	AL354766.2	0.40998	4.38402e-21
CASP9	AC010186.3	0.409691	4.70003e-21
CASP6	LINC02562	0.409462	4.96493e-21
GPX4	LINC02001	0.407281	8.36419e-21
GPX4	MELTF-AS1	0.405175	1.37901e-20
CASP9	AC009506.1	0.404744	1.52681e-20
GPX4	AL118516.1	0.403829	1.89469e-20
GSDME	LINC02081	0.403659	1.97176e-20
GPX4	AC015982.1	0.402655	2.4967e-20
GSDMC	FAM83A-AS1	0.401848	3.01566e-20
GSDMD	SNHG12	0.40156	3.22626e-20
CASP6	AC019171.1	0.40112	3.5751e-20
CASP6	AL355488.1	0.400589	4.04589e-20
GSDMD	AC040977.1	0.400347	4.28014e-20
CASP6	AC012073.1	0.39925	5.52243e-20
GSDMD	MIATNB	0.398826	6.09298e-20
GPX4	RTCA-AS1	0.398726	6.23494e-20
GPX4	PITPNA-AS1	0.398719	6.24627e-20
NLRP3	AC090559.1	0.397851	7.63334e-20
TIRAP	MID1IP1-AS1	0.397051	9.17792e-20
GSDMB	RUSC1-AS1	0.396359	1.07605e-19
PYCARD	AC087741.2	0.395529	1.30154e-19
CASP9	AC254633.1	0.393776	1.94191e-19
GPX4	ZNF667-AS1	0.393764	1.94749e-19
GPX4	AC008946.1	0.392157	2.80444e-19
GSDMD	AC103706.1	0.392122	2.82662e-19
GSDMA	AC004816.1	0.39212	2.82764e-19
GPX4	AC027307.2	0.39159	3.18761e-19
PYCARD	AL023284.4	0.391161	3.51197e-19
GPX4	LINC01569	0.3911	3.56055e-19
CASP9	AC060780.1	0.390725	3.87433e-19
CASP9	AC100861.1	0.389436	5.1763e-19
CASP6	AL354892.2	0.389348	5.27893e-19
CASP6	JPX	0.389115	5.56282e-19
GPX4	ATP2A1-AS1	0.388809	5.95696e-19
GPX4	AC112491.1	0.388706	6.0952e-19
GSDMD	AC026740.1	0.388281	6.70303e-19
GSDME	LINC01322	0.387908	7.28543e-19
GPX4	TP53TG1	0.387836	7.40364e-19
GSDMA	AC138207.5	0.387517	7.94784e-19
PLCG1	AC008735.2	0.387229	8.47462e-19
GPX4	AC023509.4	0.387212	8.50787e-19
CASP1	LINC00165	0.386233	1.05727e-18
GPX4	AL031665.2	0.385998	1.11391e-18
GPX4	AC004918.1	0.385998	1.11391e-18
GSDMD	AC010531.6	0.385389	1.2746e-18
CASP9	AF131215.5	0.385309	1.29741e-18
GPX4	AC026801.2	0.385249	1.31481e-18
CASP9	AL391121.1	0.385028	1.3807e-18
GSDMD	AC147067.1	0.384767	1.46253e-18
GPX4	AL136295.7	0.383773	1.82056e-18
GPX4	COLCA1	0.382647	2.33081e-18
PYCARD	LINC01503	0.381661	2.89161e-18
GPX4	AC025181.2	0.381246	3.16585e-18
GSDMD	PCED1B-AS1	0.381056	3.29949e-18
GPX4	AL023803.2	0.380663	3.59444e-18
GSDMB	AL022328.2	0.38038	3.82247e-18
PLCG1	AC015849.3	0.379893	4.24875e-18
GPX4	PIK3CD-AS2	0.379062	5.08764e-18
SCAF11	AC073569.2	0.378454	5.80229e-18
GPX4	GAS5	0.378238	6.07847e-18
GSDMD	AC245297.3	0.377966	6.44528e-18
NOD1	AC018653.3	0.377268	7.49062e-18
CASP9	C5orf66-AS1	0.377161	7.66552e-18
GSDMD	AL158152.2	0.376971	7.98521e-18
GPX4	AC046143.2	0.376884	8.13568e-18
GSDMB	AP002807.1	0.376698	8.46706e-18
GPX4	AC099518.6	0.376677	8.5051e-18
CASP6	AC127024.5	0.376512	8.81126e-18
GSDMD	AL441992.1	0.375544	1.0842e-17
CASP6	AL390728.6	0.374844	1.25873e-17
GPX4	AC138207.2	0.374481	1.3602e-17
CASP9	AC079414.3	0.374316	1.4087e-17
CASP6	OLMALINC	0.37405	1.49074e-17
CASP9	LINC00511	0.374035	1.49546e-17
CASP9	AATBC	0.373849	1.55577e-17
CASP9	ELF3-AS1	0.373696	1.60737e-17
SCAF11	FAM160A1-DT	0.373131	1.81188e-17
IL18	AP001453.2	0.372951	1.88238e-17
GSDMA	LINC02323	0.372567	2.04162e-17
GPX4	AC009779.2	0.372486	2.07733e-17
CASP9	AC008124.1	0.371061	2.80577e-17
GPX4	SNHG9	0.371034	2.82135e-17
GSDME	LINC01116	0.370836	2.9414e-17
CASP6	SNHG1	0.370665	3.04911e-17
NOD2	AC138207.4	0.370395	3.22726e-17
NLRP1	AC083964.1	0.370296	3.29509e-17
NLRP1	AC090589.3	0.370096	3.43623e-17
GPX4	AL355472.1	0.369799	3.65717e-17
PYCARD	AL139246.5	0.369516	3.88014e-17
GPX4	LINC01089	0.369046	4.28099e-17
GPX4	AC024075.2	0.369022	4.30292e-17
CASP6	UBA6-AS1	0.36849	4.80769e-17
PLCG1	AL360181.2	0.367984	5.34237e-17
NLRP1	TBILA	0.367875	5.46538e-17
CASP6	EIF3J-DT	0.366934	6.64591e-17
GPX4	SNHG17	0.36693	6.65086e-17
GPX4	AC009309.1	0.366546	7.20265e-17
GSDMD	LINC00944	0.365975	8.10633e-17
PLCG1	AC087481.3	0.365766	8.46281e-17
GPX4	AL451085.2	0.365693	8.59285e-17
NOD1	C1RL-AS1	0.365289	9.34032e-17
SCAF11	EBLN3P	0.364877	1.01675e-16
CASP9	AC005083.1	0.364495	1.09981e-16
GPX4	TOLLIP-AS1	0.364172	1.17548e-16
GPX4	AC108047.1	0.363352	1.39063e-16
GPX4	AC009065.8	0.362523	1.64776e-16
CASP3	LINC00342	0.362402	1.68904e-16
CASP1	AC002401.4	0.361429	2.05931e-16
PYCARD	AP003068.1	0.361284	2.12114e-16
CASP6	AC007996.1	0.360834	2.32435e-16
GPX4	LINC00963	0.360794	2.34342e-16
PLCG1	AC138028.4	0.360647	2.41434e-16
GSDMB	AL645608.7	0.360552	2.46103e-16
GSDME	AL135818.2	0.360178	2.65527e-16
GPX4	AP001160.3	0.359117	3.2904e-16
GPX4	ILF3-DT	0.358629	3.63085e-16
GSDME	LINC00958	0.358213	3.94816e-16
CASP9	AC005332.4	0.358199	3.95917e-16
GSDMD	SCAMP1-AS1	0.357934	4.17545e-16
GPX4	AC020910.4	0.357836	4.25852e-16
CASP9	AL391244.2	0.357438	4.61352e-16
CASP6	IPO5P1	0.357431	4.61993e-16
CASP3	AC005586.1	0.356919	5.11892e-16
CASP6	AC092718.4	0.356222	5.88498e-16
PLCG1	NORAD	0.35576	6.45356e-16
GPX4	AP002748.3	0.355186	7.23457e-16
GSDMD	VIM-AS1	0.35502	7.47804e-16
GSDME	LINC01605	0.354345	8.55181e-16
AIM2	LINC02446	0.354252	8.70998e-16
GPX4	AL355338.1	0.353755	9.61259e-16
CASP6	TRAM2-AS1	0.353595	9.92105e-16
CASP4	LINC02154	0.353343	1.04291e-15
GSDMA	AL139385.1	0.353073	1.10005e-15
CASP9	AL604028.1	0.352959	1.12517e-15
GPX4	AC108488.1	0.352391	1.25856e-15
CASP3	TNFRSF10A-AS1	0.351834	1.40443e-15
NOD1	AC018647.2	0.351758	1.42561e-15
GPX4	AC124798.1	0.351365	1.54009e-15
NOD2	AC025048.4	0.351024	1.64672e-15
PLCG1	AL049840.1	0.35076	1.73398e-15
TIRAP	AC004918.3	0.350479	1.83204e-15
CASP6	NIFK-AS1	0.350034	1.99893e-15
CASP9	AC096677.1	0.349988	2.01687e-15
GSDMB	AC080112.1	0.349749	2.11323e-15
NLRP1	AC027796.4	0.349642	2.15803e-15
PYCARD	LINC01137	0.349139	2.3801e-15
CASP3	AP005482.3	0.349045	2.42406e-15
GPX4	SNHG10	0.348914	2.48709e-15
GSDMD	AL354836.1	0.348391	2.75324e-15
GPX4	LINC01063	0.348134	2.894e-15
GPX4	AC011468.1	0.348073	2.92871e-15
GSDMD	AC103591.3	0.348033	2.95156e-15
NOD2	AC008663.1	0.347936	3.00762e-15
GPX4	AC021028.1	0.347407	3.33189e-15
GPX4	AP000251.1	0.347362	3.36146e-15
PLCG1	ANKRD10-IT1	0.347138	3.51041e-15
SCAF11	AC007406.5	0.347066	3.55947e-15
GPX4	LINC01451	0.346945	3.64348e-15
GSDMD	PRR34-AS1	0.346602	3.89291e-15
NLRP1	RAD51-AS1	0.345894	4.46252e-15
SCAF11	AL354733.3	0.345409	4.89941e-15
GSDME	MANCR	0.34535	4.95484e-15
CASP6	AC018645.2	0.345328	4.97635e-15
TIRAP	BACE1-AS	0.344923	5.37848e-15
TIRAP	WNT5A-AS1	0.344411	5.93271e-15
CASP9	AC080037.1	0.344271	6.09492e-15
GPX4	POLR2J4	0.344266	6.10031e-15
GSDMB	SLC25A25-AS1	0.344212	6.16382e-15
PYCARD	AC018816.1	0.343748	6.73539e-15
CASP9	LINC01139	0.343512	7.04639e-15
GSDMD	SNHG19	0.343411	7.18389e-15
PLCG1	AL928654.2	0.343072	7.6637e-15
TIRAP	AL022323.1	0.343023	7.7349e-15
GSDMD	AC005840.4	0.342797	8.07561e-15
NLRP1	AL132989.1	0.342494	8.55485e-15
CASP6	AL050341.2	0.342377	8.74786e-15
GSDMD	AC242842.1	0.342264	8.93807e-15
IL18	NOP14-AS1	0.342065	9.28211e-15
GSDMD	AL117379.1	0.341857	9.65591e-15
CASP6	RNASEH1-AS1	0.341702	9.94349e-15
GPX4	AL035258.1	0.341117	1.11103e-14
PLCG1	AC115618.2	0.340747	1.19158e-14
PYCARD	AL445524.1	0.340231	1.31349e-14
CASP6	UBR5-AS1	0.339563	1.48973e-14
GSDMD	HOXC-AS1	0.339456	1.51989e-14
CASP6	DANCR	0.339252	1.57951e-14
CASP6	AC004656.1	0.339165	1.60536e-14
GPX4	AC005696.1	0.339006	1.65416e-14
CASP6	PSMA3-AS1	0.338531	1.80847e-14
AIM2	MIR155HG	0.338516	1.81352e-14
CASP1	C20orf197	0.338384	1.85875e-14
GPX4	NCK1-DT	0.338324	1.87998e-14
GSDMD	HLA-DQB1-AS1	0.337904	2.03359e-14
CASP6	AC007038.2	0.337786	2.07926e-14
GSDMA	APCDD1L-DT	0.337693	2.11568e-14
CASP6	WAC-AS1	0.337684	2.1191e-14
TIRAP	AL035587.1	0.337627	2.14201e-14
GSDMC	AL049555.1	0.336787	2.50521e-14
SCAF11	AC099850.3	0.336171	2.80984e-14
CASP6	TMPO-AS1	0.336133	2.82957e-14
SCAF11	AC084859.1	0.335562	3.14652e-14
NOD2	AL162424.1	0.335302	3.30179e-14
IL18	HOXC13-AS	0.335177	3.37924e-14
GSDMD	HOTAIRM1	0.334929	3.53768e-14
PRKACA	MBNL1-AS1	0.334681	3.70416e-14
SCAF11	HCG11	0.334077	4.14115e-14
GPX4	AC005076.1	0.33394	4.24741e-14
GSDMD	AC002116.2	0.333549	4.56493e-14
AIM2	LINC02100	0.333446	4.65163e-14
NLRP1	AC048341.2	0.333325	4.7564e-14
CASP9	AL022328.1	0.333324	4.75774e-14
PRKACA	AC091563.1	0.333324	4.75781e-14
GPX4	AL358472.3	0.332985	5.06343e-14
PRKACA	MIR600HG	0.332808	5.23102e-14
GSDMB	ASH1L-AS1	0.332802	5.23667e-14
GSDMC	AC021078.1	0.332669	5.3662e-14
GPX4	AC027031.2	0.332344	5.6954e-14
CASP9	LINC00526	0.332189	5.85974e-14
CASP9	AL390719.2	0.332114	5.94105e-14
NLRP1	GABPB1-AS1	0.332035	6.02729e-14
SCAF11	OGFRP1	0.332	6.06629e-14
TIRAP	AL158212.3	0.331678	6.43423e-14
GPX4	LINC01578	0.331591	6.53809e-14
GPX4	AC100814.1	0.331207	7.01343e-14
GPX4	FLJ46906	0.330711	7.67725e-14
CASP9	AL391244.1	0.330392	8.13683e-14
GPX4	AL589843.1	0.329754	9.13736e-14
GSDMD	AC040970.1	0.328821	1.08216e-13
CASP9	LINC00839	0.328473	1.15259e-13
NLRP1	PCAT19	0.328375	1.17313e-13
PRKACA	LINC00885	0.328147	1.22235e-13
GPX4	KANSL1-AS1	0.327703	1.32429e-13
GSDMB	AC116407.2	0.327669	1.33243e-13
PLCG1	LENG8-AS1	0.327661	1.33452e-13
CASP9	AC106782.2	0.327651	1.33689e-13
CASP3	AL450992.2	0.327519	1.36897e-13
GSDMD	AC105446.1	0.327229	1.44249e-13
CASP9	SOX21-AS1	0.326773	1.56562e-13
PYCARD	AC131009.3	0.326543	1.63162e-13
GSDME	LINP1	0.326532	1.63499e-13
TNF	AC113346.1	0.326424	1.66683e-13
GPX4	CEBPA-DT	0.326376	1.68126e-13
CASP9	AC008771.1	0.326289	1.70769e-13
CASP9	AL691482.3	0.326139	1.75425e-13
PLCG1	AL031985.3	0.3261	1.76663e-13
CASP4	AC004585.1	0.325639	1.91855e-13
CASP9	LINC01560	0.325571	1.94199e-13
GSDMD	ASMTL-AS1	0.32555	1.94925e-13
CASP6	AC108860.2	0.325152	2.09294e-13
GPX4	GS1-124K5.4	0.32506	2.1279e-13
GSDMB	AL021707.8	0.325	2.15061e-13
CASP6	AL031673.1	0.324905	2.18747e-13
PLCG1	AL118506.1	0.324667	2.28242e-13
SCAF11	AC005288.1	0.324209	2.47647e-13
TIRAP	AC093278.2	0.324155	2.50006e-13
GSDME	GSEC	0.323957	2.58964e-13
CASP6	AC016065.1	0.323921	2.60649e-13
IL18	AC010735.2	0.323625	2.74721e-13
GPX4	DCST1-AS1	0.323508	2.80459e-13
GSDMD	AC005726.3	0.323438	2.84007e-13
NOD2	AC244205.1	0.323082	3.02507e-13
PLCG1	AC084018.1	0.322995	3.07169e-13
CASP9	BAIAP2-DT	0.322509	3.34769e-13
GPX4	SNHG5	0.322295	3.477e-13
GSDMB	AC116914.2	0.322129	3.58042e-13
NOD2	AL033384.1	0.32168	3.87597e-13
CASP6	AC023043.1	0.321551	3.9645e-13
CASP9	AC008115.3	0.321196	4.22064e-13
CASP6	DLEU2	0.321125	4.2735e-13
GPX4	MCF2L-AS1	0.321008	4.36263e-13
GSDME	AL596244.1	0.320715	4.59274e-13
CASP9	LINC00649	0.320366	4.88326e-13
CASP6	FGF14-AS2	0.31899	6.21219e-13
CASP9	AC098484.1	0.318913	6.29698e-13
GPX4	BX322562.1	0.318843	6.37405e-13
SCAF11	AC005034.3	0.318542	6.71712e-13
GSDMD	AC007228.1	0.318542	6.718e-13
CASP9	AC135050.6	0.318492	6.77681e-13
GPX4	Z69706.1	0.318016	7.36119e-13
GSDMB	AC006001.2	0.317695	7.78351e-13
CASP9	LINC02542	0.317634	7.86734e-13
GSDMD	AC103702.2	0.316697	9.25489e-13
GPX4	CDC37L1-DT	0.316621	9.3778e-13
IL6	AL161431.1	0.316263	9.97575e-13
GSDME	LINC00460	0.31621	1.00679e-12
SCAF11	PLBD1-AS1	0.314794	1.28501e-12
GPX4	SNHG20	0.314777	1.28874e-12
CASP1	PICSAR	0.314321	1.39363e-12
SCAF11	AL049840.2	0.31386	1.50826e-12
NLRP1	AL031186.1	0.313797	1.52444e-12
GSDMD	AC008035.1	0.312903	1.7763e-12
PLCG1	AC011451.1	0.312879	1.78353e-12
GSDMD	AC004241.3	0.312142	2.02199e-12
GPX4	AC026401.3	0.310848	2.51858e-12
PLCG1	AC092535.4	0.310284	2.77056e-12
GPX4	PRKAG2-AS1	0.309466	3.18076e-12
IL18	AL591845.1	0.308709	3.61248e-12
PLCG1	AC022211.3	0.30798	4.0823e-12
GPX4	AC083880.1	0.30775	4.2423e-12
PRKACA	LOXL1-AS1	0.307714	4.26812e-12
GPX4	AC092171.5	0.307139	4.69811e-12
PYCARD	FOXN3-AS1	0.307022	4.79094e-12
TIRAP	AC067852.2	0.306686	5.06727e-12
NLRP1	AC015813.1	0.306674	5.07698e-12
GPX4	AL391834.2	0.306165	5.52596e-12
GSDMB	ARHGAP27P1-BPTFP1-KPNA2P3	0.305742	5.92809e-12
GPX4	AL138781.1	0.305639	6.031e-12
GPX4	AL513165.1	0.305162	6.52725e-12
GSDME	MYOSLID	0.30498	6.72724e-12
NLRP1	CCDC18-AS1	0.304176	7.68278e-12
GPX4	AC145207.5	0.304108	7.7702e-12
GSDMC	AL049840.3	0.303634	8.40134e-12
TIRAP	LINC00324	0.303492	8.59966e-12
GSDMC	AC009902.2	0.303173	9.06402e-12
GPX4	AL080317.1	0.303145	9.10502e-12
TIRAP	LINC01963	0.303046	9.25461e-12
GSDME	AC091182.2	0.302962	9.38347e-12
CASP4	LINC00707	0.302933	9.42852e-12
CASP6	AC091271.1	0.302882	9.50818e-12
TIRAP	TMEM9B-AS1	0.302594	9.96729e-12
GSDME	AC012065.3	0.302481	1.01546e-11
GPX4	AC092803.2	0.301601	1.17275e-11
TIRAP	USP46-AS1	0.301336	1.22466e-11
CASP6	AC124283.2	0.30098	1.29781e-11
GPX4	LINC01703	0.300816	1.33294e-11
GSDME	GAS6-DT	0.300254	1.46069e-11
GSDME	AC019080.1	-0.306619	5.12434e-12
SCAF11	AC093673.1	-0.31416	1.43258e-12
GSDME	LINC01133	-0.314338	1.38957e-12
SCAF11	CHKB-DT	-0.328035	1.24731e-13
IL18	ZEB1-AS1	-0.331573	6.55911e-14
CASP9	MIR193BHG	-0.335669	3.08456e-14
GSDME	AL035661.1	-0.346212	4.1973e-15
SCAF11	AC098487.1	-0.351501	1.49953e-15
GSDMD	AC073896.4	0.555173	1.4658e-40
PYCARD	AC012510.1	0.516381	2.07577e-34
GPX4	SNHG6	0.511871	9.59335e-34
AIM2	LINC01871	0.494629	2.71912e-31
GSDMD	USP30-AS1	0.490904	8.8357e-31
TIRAP	AC024075.1	0.489699	1.28927e-30
CASP1	USP30-AS1	0.48502	5.51956e-30
PYCARD	AC073896.4	0.483905	7.7788e-30
GPX4	LINC01023	0.480535	2.17758e-29
PYCARD	AL021707.6	0.479775	2.74269e-29
TIRAP	AC108449.2	0.477091	6.16546e-29
AIM2	LINC02195	0.47269	2.29073e-28
GPX4	AC008608.2	0.472661	2.31026e-28
GSDMD	AC108673.3	0.471872	2.91765e-28
GPX4	AC138696.2	0.471114	3.64824e-28
CASP1	HCP5	0.470447	4.43938e-28
GSDMD	AC097468.3	0.467	1.21543e-27
TIRAP	AC108010.1	0.46668	1.33382e-27
CASP6	AC019131.2	0.45942	1.07017e-26
GSDMD	AC069281.2	0.452218	8.04366e-26
GPX4	SNHG8	0.450433	1.31642e-25
CASP9	FAM111A-DT	0.450333	1.35294e-25
CASP6	AC104794.2	0.450071	1.4539e-25
CASP6	AC005332.6	0.448527	2.21969e-25
SCAF11	AC008764.2	0.447453	2.9763e-25
GSDMD	YTHDF3-AS1	0.446745	3.60807e-25
GSDMD	AC109322.1	0.444737	6.21556e-25
CASP9	PTOV1-AS1	0.443069	9.74049e-25
GPX4	AC026979.2	0.44231	1.19395e-24
CASP3	MIR9-3HG	0.441972	1.30673e-24
CASP3	AC005332.6	0.439966	2.23115e-24
PRKACA	AC005332.6	0.438829	3.01641e-24
GPX4	AC012510.1	0.435281	7.67398e-24
GPX4	ARRDC1-AS1	0.435086	8.07617e-24
GPX4	AC011445.2	0.434118	1.0397e-23
GPX4	AC009065.4	0.433687	1.16316e-23
CASP3	FGD5-AS1	0.432741	1.48735e-23
CASP6	AC016205.1	0.431694	1.9508e-23
GPX4	ZSCAN16-AS1	0.430838	2.43319e-23
GSDMD	CH17-340M24.3	0.430666	2.54341e-23
GSDMD	EPB41L4A-AS1	0.428832	4.07334e-23
GSDMD	AC133552.5	0.42493	1.09944e-22
GSDMD	TRIM52-AS1	0.423379	1.62559e-22
CASP6	AC109347.2	0.4232	1.70034e-22
CASP6	FOXD3-AS1	0.422198	2.18622e-22
PYCARD	LINC01023	0.421651	2.50691e-22
NOD2	AC129492.1	0.420614	3.24759e-22
GSDMD	AL035461.2	0.419113	4.71605e-22
TIRAP	LINC00265	0.418495	5.49522e-22
CASP6	LNCTAM34A	0.417519	6.99314e-22
CASP3	TNRC6C-AS1	0.416402	9.20684e-22
PYCARD	AC103691.1	0.415249	1.22148e-21
GPX4	AL355353.1	0.414557	1.44668e-21
NOD2	AC083841.1	0.413913	1.69245e-21
TIRAP	FAM111A-DT	0.41316	2.03272e-21
GSDMD	MINCR	0.411803	2.82471e-21
GPX4	ZFAS1	0.411779	2.84144e-21
PYCARD	FLJ20021	0.411294	3.19477e-21
NOD1	AC108010.1	0.409443	4.98737e-21
GSDMD	AL117332.1	0.408879	5.70951e-21
CASP3	AC016205.1	0.407744	7.48982e-21
GPX4	LNCTAM34A	0.407726	7.52266e-21
CASP6	AC012467.2	0.40732	8.2861e-21
GSDMD	AC139530.1	0.406933	9.08587e-21
CASP6	AC024060.1	0.406107	1.1057e-20
GSDMD	AC008443.4	0.405659	1.22971e-20
CASP6	ASB16-AS1	0.405356	1.32107e-20
GSDMB	ASB16-AS1	0.405331	1.32885e-20
GSDMD	AC040169.1	0.404914	1.46659e-20
PYCARD	AP001505.1	0.404844	1.49107e-20
PYCARD	AC108673.3	0.404742	1.52768e-20
CASP6	TNRC6C-AS1	0.404612	1.57534e-20
PYCARD	SNHG8	0.404099	1.7777e-20
CASP6	LINC00339	0.403553	2.02193e-20
GPX4	MHENCR	0.403305	2.14307e-20
CASP6	LINC01006	0.402815	2.40447e-20
NOD2	AC115522.1	0.402278	2.72699e-20
GSDMD	SNHG11	0.401439	3.31803e-20
CASP6	AC091057.1	0.401408	3.34263e-20
CASP3	FAM111A-DT	0.400625	4.01221e-20
CASP6	MIR9-3HG	0.399665	5.0163e-20
CASP3	APTR	0.398485	6.5931e-20
SCAF11	LINC00265	0.398388	6.7427e-20
GPX4	AC104794.2	0.398196	7.04921e-20
CASP6	DNAJC9-AS1	0.397643	8.00882e-20
GSDMD	PSMB8-AS1	0.397238	8.79234e-20
NLRP1	AP000254.1	0.396637	1.00938e-19
CASP3	AC104794.2	0.395076	1.44377e-19
GSDMD	AC084824.5	0.39501	1.46574e-19
CASP6	AC124016.2	0.393948	1.86749e-19
GSDMD	U62317.2	0.393475	2.07971e-19
SCAF11	FGD5-AS1	0.393259	2.18415e-19
CASP9	AC010503.4	0.391969	2.92606e-19
CASP6	AP000254.1	0.391786	3.04955e-19
CASP9	LINC01315	0.391393	3.33302e-19
GPX4	AP006621.3	0.391335	3.37667e-19
TIRAP	AC073046.1	0.391324	3.38519e-19
CASP9	FGD5-AS1	0.39093	3.69981e-19
PRKACA	AL450326.1	0.390684	3.91071e-19
TIRAP	OIP5-AS1	0.390538	4.04085e-19
NLRP1	AL035071.1	0.390458	4.1142e-19
CASP9	FOXD3-AS1	0.389537	5.06053e-19
CASP9	PTOV1-AS2	0.389505	5.0965e-19
CASP6	CRNDE	0.389133	5.54022e-19
GPX4	AL138724.1	0.388983	5.72975e-19
CASP9	LINC02562	0.388782	5.99308e-19
SCAF11	AL450326.1	0.388469	6.42799e-19
CASP3	LNCTAM34A	0.388257	6.73933e-19
GPX4	AL021707.6	0.388222	6.79174e-19
CASP9	LINC01006	0.387884	7.32451e-19
CASP9	LINC00339	0.387811	7.4439e-19
PYCARD	AC015912.3	0.38708	8.76087e-19
GPX4	AC008610.1	0.38687	9.17983e-19
PYCARD	TP53TG1	0.386453	1.00698e-18
GPX4	AP001505.1	0.386373	1.02509e-18
GPX4	AC010969.2	0.385603	1.21583e-18
GSDMD	AC010542.5	0.385505	1.24229e-18
NOD1	AC090559.1	0.385448	1.25808e-18
GSDMD	TP53TG1	0.38527	1.30854e-18
GSDMD	DNAJC9-AS1	0.385217	1.32403e-18
CASP3	AC010186.3	0.384766	1.46286e-18
GPX4	SNHG25	0.384705	1.48267e-18
CASP9	OSER1-DT	0.384394	1.58768e-18
GPX4	AC040977.1	0.384372	1.59547e-18
PLCG1	CTBP1-DT	0.384081	1.70101e-18
GPX4	MIR4435-2HG	0.383706	1.84728e-18
GSDMD	AC087741.2	0.383282	2.02802e-18
CASP3	THAP9-AS1	0.382534	2.38919e-18
CASP6	SREBF2-AS1	0.382346	2.4894e-18
CASP9	AC006449.6	0.382285	2.52293e-18
GPX4	AC132192.2	0.381442	3.03319e-18
GSDMD	DLG5-AS1	0.380985	3.35108e-18
PYCARD	AC097468.3	0.38034	3.85627e-18
CASP6	FLJ37453	0.380165	4.00555e-18
PRKACA	AC012467.2	0.379395	4.73309e-18
PYCARD	RAB11B-AS1	0.379221	4.9156e-18
NOD2	AL034376.1	0.379035	5.11739e-18
CASP3	OIP5-AS1	0.378939	5.22453e-18
CASP9	THAP9-AS1	0.378066	6.30792e-18
GSDMB	U62317.2	0.378003	6.39408e-18
TIRAP	AC005332.6	0.377831	6.63651e-18
CASP9	AC024896.1	0.377188	7.62028e-18
CASP6	AC006449.6	0.377054	7.84449e-18
GSDMA	LINC01214	0.377044	7.8598e-18
PRKACA	ASB16-AS1	0.376841	8.21184e-18
GPX4	AC034213.1	0.376354	9.11552e-18
CASP9	AL354892.2	0.375562	1.07996e-17
GSDMD	RAB11B-AS1	0.375338	1.13288e-17
PYCARD	SNHG25	0.374948	1.23117e-17
GSDMD	AC011374.2	0.374747	1.28527e-17
PYCARD	CH17-340M24.3	0.374148	1.45988e-17
NLRP1	TNRC6C-AS1	0.373739	1.59256e-17
TIRAP	AC060780.1	0.373476	1.68402e-17
GPX4	SREBF2-AS1	0.372897	1.90393e-17
GSDMB	THAP9-AS1	0.372297	2.16191e-17
GPX4	C5orf66-AS1	0.372086	2.26016e-17
GSDMD	KMT2E-AS1	0.370904	2.89987e-17
NLRP1	AL022328.2	0.370537	3.13272e-17
GPX4	AL121832.2	0.370132	3.41011e-17
GPX4	AC103706.1	0.370081	3.44702e-17
CASP6	PTOV1-AS2	0.369911	3.57228e-17
GSDMD	AC067838.1	0.369833	3.63076e-17
CASP9	AF131215.6	0.369829	3.63414e-17
CASP6	AC105942.1	0.36963	3.78886e-17
CASP6	AC005332.3	0.368866	4.44521e-17
CASP9	LINC00847	0.368563	4.73495e-17
PYCARD	AC069281.2	0.368388	4.91192e-17
CASP6	UBL7-AS1	0.367652	5.72542e-17
GSDMD	AC046143.2	0.367448	5.97324e-17
GSDMD	ATP2A1-AS1	0.367324	6.12937e-17
CASP6	AC012615.1	0.366726	6.93841e-17
CASP6	AF131215.6	0.366642	7.06002e-17
CASP3	LINC02562	0.366626	7.08419e-17
GPX4	AC083964.1	0.36656	7.1821e-17
PRKACA	AC009506.1	0.366131	7.84799e-17
GPX4	PTOV1-AS1	0.366063	7.95994e-17
CASP6	LINC00847	0.365885	8.25811e-17
PRKACA	AC008764.2	0.365307	9.30496e-17
GSDMA	LINC01094	0.365152	9.60725e-17
NLRP1	AC120053.1	0.365112	9.68747e-17
TIRAP	AL391121.1	0.364857	1.02095e-16
PYCARD	SPINT1-AS1	0.364322	1.13962e-16
CASP9	AC109347.2	0.36338	1.3828e-16
GPX4	LIPE-AS1	0.363337	1.39509e-16
NLRP1	AC024075.2	0.36272	1.5826e-16
CASP6	APTR	0.362711	1.58559e-16
PLCG1	AL365330.1	0.362466	1.66721e-16
CASP9	AC019131.2	0.361732	1.9363e-16
GSDMB	AL591895.1	0.361666	1.96237e-16
CASP6	AC079414.3	0.361191	2.16182e-16
PYCARD	AC010969.2	0.360838	2.32262e-16
GSDMB	PSMB8-AS1	0.360616	2.42939e-16
GPX4	AC005332.3	0.360216	2.63456e-16
CASP3	LINC00909	0.35991	2.80319e-16
TIRAP	FGD5-AS1	0.359548	3.01625e-16
PYCARD	AL158152.2	0.359153	3.26634e-16
NLRP1	AC008735.2	0.358899	3.43835e-16
GPX4	FLJ37453	0.358871	3.45753e-16
CASP3	AC096992.2	0.358737	3.55227e-16
NLRP1	AC084824.5	0.35831	3.87195e-16
CASP6	AC125257.1	0.357577	4.48574e-16
PYCARD	SNHG15	0.357199	4.83965e-16
NOD2	FAM83A-AS1	0.35719	4.84875e-16
GSDMD	AC020765.2	0.356837	5.20332e-16
CASP6	AC067838.1	0.356483	5.58579e-16
TIRAP	AC090559.1	0.355961	6.2001e-16
GSDMD	AC073896.2	0.355817	6.38007e-16
GPX4	APTR	0.355409	6.92027e-16
GSDMD	RPARP-AS1	0.355369	6.97675e-16
PYCARD	ZSCAN16-AS1	0.354431	8.40664e-16
CASP6	TMEM161B-AS1	0.354356	8.53303e-16
CASP6	AC009005.1	0.354034	9.09563e-16
CASP9	AC036176.1	0.353505	1.01012e-15
AIM2	LINC00623	0.353489	1.01329e-15
CASP6	AC106795.2	0.353432	1.02465e-15
PYCARD	SNHG7	0.353322	1.04734e-15
CASP9	AC024075.2	0.353276	1.05689e-15
CASP6	EPB41L4A-AS1	0.352634	1.19963e-15
CASP9	ZNF667-AS1	0.352551	1.2195e-15
CASP1	U62317.1	0.352414	1.25298e-15
CASP6	SNHG6	0.352284	1.28545e-15
NLRP1	AL360181.2	0.352177	1.31285e-15
CASP6	AC024896.1	0.352049	1.34623e-15
GPX4	AC092718.4	0.351763	1.42425e-15
CASP6	MAPKAPK5-AS1	0.351106	1.62047e-15
GSDMD	AC138207.2	0.350863	1.69943e-15
CASP3	JPX	0.350683	1.7606e-15
GPX4	TNRC6C-AS1	0.350622	1.78153e-15
CASP6	AL392172.1	0.350572	1.79915e-15
PYCARD	AC011445.2	0.349416	2.25522e-15
PRKACA	FGD5-AS1	0.349016	2.43814e-15
GPX4	AC055822.1	0.348528	2.68087e-15
GPX4	AP003352.1	0.348348	2.77644e-15
PYCARD	AC008608.2	0.34833	2.78608e-15
CASP3	AC100861.1	0.348305	2.79975e-15
NOD1	AL360181.2	0.348248	2.83076e-15
CASP9	AC124016.2	0.347873	3.04431e-15
GPX4	SNHG7	0.347717	3.1377e-15
SCAF11	AC008124.1	0.347515	3.26317e-15
NLRP1	AL390728.6	0.347136	3.51157e-15
GSDMD	AC015982.1	0.347086	3.54563e-15
CASP3	AL390728.6	0.346935	3.65036e-15
GPX4	LINC00944	0.346759	3.77689e-15
CASP3	AC019131.2	0.346145	4.25153e-15
CASP6	AC009506.1	0.346077	4.30792e-15
PRKACA	OIP5-AS1	0.346015	4.35998e-15
CASP3	ASB16-AS1	0.345758	4.58082e-15
CASP3	AC007996.1	0.345624	4.70046e-15
GSDMD	AC120053.1	0.345474	4.83817e-15
CASP9	AL591895.1	0.345279	5.02316e-15
CASP9	AC091982.3	0.34517	5.12936e-15
GSDMD	AC084033.3	0.344763	5.54552e-15
CASP3	IPO5P1	0.344643	5.6753e-15
NOD1	ANKRD10-IT1	0.344428	5.91401e-15
PLCG1	PTOV1-AS2	0.344286	6.07682e-15
PYCARD	U62317.1	0.344284	6.07979e-15
GSDMD	AC024060.1	0.343897	6.54696e-15
GPX4	SNHG12	0.343393	7.20868e-15
CASP6	AP002807.1	0.34293	7.87319e-15
CASP3	AC060780.1	0.342885	7.94155e-15
GPX4	AC010531.6	0.342573	8.42665e-15
GSDMB	AC007991.2	0.342482	8.57397e-15
GPX4	AC104825.1	0.342469	8.59637e-15
CASP3	AC079610.2	0.342043	9.32051e-15
NLRP1	AP002807.1	0.341582	1.01731e-14
CASP9	LINC00342	0.341385	1.05591e-14
PYCARD	AL355353.1	0.341314	1.07029e-14
CASP6	AC100861.1	0.34116	1.10189e-14
CASP6	AC008124.1	0.340353	1.28361e-14
GSDMD	AL136295.7	0.340277	1.30214e-14
GSDMD	U62317.4	0.340258	1.30677e-14
CASP3	DTX2P1-UPK3BP1-PMS2P11	0.339787	1.42802e-14
GSDMD	MAPKAPK5-AS1	0.339713	1.44816e-14
CASP6	DTX2P1-UPK3BP1-PMS2P11	0.339353	1.54954e-14
CASP9	AC069281.2	0.339229	1.58618e-14
PRKACA	AC008124.1	0.339136	1.61436e-14
CASP1	LINC01871	0.338948	1.67223e-14
CASP3	AC024896.1	0.338627	1.77608e-14
GSDMB	TNRC6C-AS1	0.338553	1.80095e-14
PLCG1	AC008764.2	0.338541	1.80515e-14
GSDMB	AL390728.6	0.337987	2.00257e-14
GSDMB	USP30-AS1	0.337806	2.07132e-14
AIM2	AC245297.3	0.337705	2.11079e-14
CASP3	TRAM2-AS1	0.33738	2.24306e-14
CASP3	AC139795.2	0.337232	2.30599e-14
CASP1	AC245297.3	0.337075	2.37462e-14
CASP9	AL035587.1	0.337072	2.37583e-14
CASP9	AC019171.1	0.336965	2.42375e-14
PYCARD	AC138696.2	0.336958	2.42703e-14
GSDMD	AC011468.1	0.336818	2.49076e-14
NLRP1	AC024060.1	0.336707	2.54294e-14
GSDMD	LINC01503	0.336513	2.63659e-14
CASP9	AC080112.1	0.336452	2.66652e-14
IL18	AC002401.4	0.336363	2.71139e-14
GPX4	AC018645.2	0.336246	2.77086e-14
CASP8	HCP5	0.3362	2.79446e-14
NLRP1	TMEM161B-AS1	0.335592	3.1289e-14
PRKACA	AC139795.2	0.335528	3.16647e-14
GPX4	AC096677.1	0.335479	3.19515e-14
CASP3	AC012467.2	0.335458	3.20777e-14
CASP3	AL355488.1	0.335234	3.34366e-14
PLCG1	LINC00265	0.334966	3.51365e-14
NLRP1	BACE1-AS	0.334946	3.52696e-14
CASP6	MELTF-AS1	0.334484	3.8414e-14
GPX4	AC005840.4	0.334417	3.88896e-14
NLRP1	AL355488.1	0.333548	4.56522e-14
PRKACA	AL022323.1	0.333469	4.63234e-14
CASP3	AC005332.4	0.333198	4.86885e-14
CASP3	SREBF2-AS1	0.33318	4.88538e-14
CASP6	AC096992.2	0.332905	5.13868e-14
GSDMC	AC083841.1	0.33205	6.01134e-14
GSDME	AC002401.4	0.331358	6.82297e-14
CASP9	AC091057.1	0.331197	7.02626e-14
PYCARD	MIATNB	0.330832	7.50984e-14
GPX4	HOXC-AS1	0.330824	7.5209e-14
CASP6	AC016876.1	0.330771	7.59453e-14
GSDMD	AC027644.3	0.330517	7.95368e-14
GSDMB	KMT2E-AS1	0.330314	8.25333e-14
CASP1	LINC02195	0.329927	8.85557e-14
CASP3	LINC00511	0.32986	8.96368e-14
CASP9	AC009779.2	0.329654	9.30574e-14
GSDMC	AC115522.1	0.329621	9.36129e-14
GSDMB	PTOV1-AS2	0.328872	1.07226e-13
GPX4	AL390719.2	0.328597	1.12703e-13
GPX4	AL604028.1	0.32843	1.1616e-13
GPX4	AL354836.1	0.328288	1.19166e-13
PRKACA	AC009779.2	0.328183	1.21458e-13
CASP6	AC132192.2	0.327671	1.33193e-13
GSDMD	PXN-AS1	0.327565	1.35763e-13
GPX4	CYTOR	0.327445	1.38746e-13
AIM2	LINC00944	0.327381	1.4035e-13
GPX4	VIM-AS1	0.327351	1.41111e-13
GPX4	AC079414.3	0.327266	1.43294e-13
CASP6	AC120053.1	0.327147	1.46389e-13
GSDMB	AC090589.3	0.326845	1.54556e-13
NLRP1	AC116407.2	0.326426	1.66617e-13
CASP9	LINC01569	0.326199	1.73546e-13
CASP9	AL355338.1	0.326075	1.77461e-13
GSDMD	AC020910.4	0.325994	1.80047e-13
TIRAP	AF131215.5	0.325984	1.80371e-13
NLRP1	AC084036.1	0.325739	1.8846e-13
SCAF11	MID1IP1-AS1	0.325645	1.91665e-13
PRKACA	OLMALINC	0.325596	1.93354e-13
NLRP1	AC087481.3	0.325578	1.93969e-13
GPX4	AC026740.1	0.325555	1.94779e-13
CASP8	AC080112.1	0.32553	1.95628e-13
CASP3	AL157394.1	0.325402	2.00164e-13
PRKACA	LINC00963	0.325378	2.01028e-13
CASP3	FOXD3-AS1	0.324823	2.21972e-13
CASP6	AC009779.2	0.324689	2.27355e-13
GSDMD	AL049840.4	0.324511	2.34671e-13
GSDMD	AC023509.4	0.324395	2.39575e-13
CASP6	AC091982.3	0.324043	2.5506e-13
PRKACA	AC104825.1	0.324028	2.55715e-13
CASP1	LINC00623	0.323873	2.62864e-13
PYCARD	USP30-AS1	0.323826	2.65102e-13
NLRP1	AL928654.2	0.323435	2.84139e-13
CASP6	RPARP-AS1	0.323265	2.92816e-13
PYCARD	AC009065.4	0.323138	2.99484e-13
GPX4	DANCR	0.322823	3.16691e-13
CASP9	NCK1-DT	0.322693	3.24079e-13
CASP3	AF131215.5	0.322626	3.27946e-13
CASP4	NOP14-AS1	0.322454	3.38082e-13
CASP6	AL391244.2	0.32238	3.42526e-13
CASP6	AL604028.1	0.322187	3.5439e-13
IL18	AC004816.1	0.32214	3.57344e-13
NOD2	LINC02560	0.322121	3.58548e-13
CASP9	AC005696.1	0.322073	3.61598e-13
CASP6	SCAMP1-AS1	0.32196	3.68873e-13
CASP9	AC105942.1	0.321793	3.79913e-13
CASP9	AC004656.1	0.321525	3.98302e-13
CASP6	LINC00526	0.321444	4.0403e-13
PRKACA	AC024075.2	0.321331	4.12153e-13
PLCG1	AC018653.3	0.320933	4.42038e-13
IL18	C20orf197	0.320782	4.53907e-13
GPX4	AL391244.1	0.320564	4.71606e-13
PLCG1	AL354733.3	0.320547	4.73055e-13
GPX4	LINC00909	0.320516	4.75674e-13
CASP3	AC008124.1	0.320312	4.92972e-13
GSDMB	APTR	0.32018	5.04523e-13
NLRP1	PSMA3-AS1	0.320083	5.13129e-13
CASP6	OSER1-DT	0.319895	5.30313e-13
GPX4	PCAT19	0.319812	5.38146e-13
PRKACA	AC005332.5	0.319711	5.47684e-13
CASP9	AC084036.1	0.319633	5.55197e-13
GSDMB	AC010542.5	0.319609	5.5757e-13
GPX4	SNHG19	0.319583	5.60086e-13
GSDMD	MIR155HG	0.319543	5.6408e-13
CASP6	PXN-AS1	0.319312	5.87302e-13
NLRP1	AC124016.2	0.319003	6.19867e-13
CASP9	AC012615.1	0.318742	6.48733e-13
NLRP1	PTOV1-AS1	0.318608	6.64043e-13
CASP9	AP000254.1	0.318462	6.81242e-13
CASP6	AC090617.5	0.318144	7.19906e-13
NLRP1	AC116914.2	0.317942	7.45651e-13
CASP9	AC016876.1	0.3178	7.64307e-13
GSDMB	AC132192.2	0.31745	8.12235e-13
CASP3	AL391244.2	0.317344	8.27324e-13
CASP6	AC005332.5	0.317332	8.28967e-13
GSDMB	AC127024.5	0.317326	8.29943e-13
GSDMB	AL354836.1	0.3172	8.4824e-13
GSDMD	AL451165.2	0.31712	8.6002e-13
CASP9	ZNF710-AS1	0.317116	8.60676e-13
GPX4	AL117379.1	0.317108	8.61806e-13
PLCG1	AC108010.1	0.316916	8.91066e-13
GSDMB	AL355488.1	0.316377	9.78074e-13
GSDMB	AC069281.2	0.316307	9.89996e-13
SCAF11	AC015849.3	0.316207	1.00721e-12
PLCG1	AC090589.3	0.316198	1.00892e-12
CASP1	PSMB8-AS1	0.316077	1.03008e-12
CASP6	AC010186.3	0.316035	1.03764e-12
PRKACA	LINC01560	0.316028	1.03882e-12
PRKACA	SREBF2-AS1	0.31602	1.04031e-12
CASP9	LINC00944	0.315762	1.08761e-12
CASP3	SOX21-AS1	0.31565	1.1089e-12
GSDMB	LINC00342	0.315322	1.17327e-12
GPX4	AL355488.1	0.315301	1.17756e-12
GPX4	ASB16-AS1	0.315149	1.20891e-12
NLRP1	SNHG12	0.315037	1.2324e-12
NLRP1	AC106795.2	0.315023	1.23527e-12
CASP9	AL450992.2	0.315001	1.24008e-12
NOD1	AL132989.1	0.314875	1.26715e-12
GPX4	AL031673.1	0.314599	1.32865e-12
IL18	AC104031.1	0.314455	1.36188e-12
GSDMB	SNHG12	0.314185	1.42644e-12
TIRAP	ANKRD10-IT1	0.313859	1.50831e-12
CASP9	AL355488.1	0.313624	1.5703e-12
GSDMB	AC004148.2	0.313437	1.62123e-12
GSDMD	FLJ46906	0.313261	1.67081e-12
NLRP1	AL022328.1	0.313259	1.67132e-12
CASP9	AC090425.1	0.31311	1.71452e-12
GSDMD	SNHG5	0.312932	1.76751e-12
SCAF11	AF131215.5	0.312526	1.89405e-12
CASP9	AC106795.2	0.312522	1.89533e-12
PYCARD	AL162424.1	0.312443	1.92101e-12
GPX4	AC135050.6	0.312052	2.05316e-12
CASP6	AL391244.1	0.312034	2.05935e-12
GSDMC	AC138028.4	0.311878	2.11498e-12
NOD1	AC138028.4	0.311728	2.16963e-12
GSDMD	AC027307.2	0.311693	2.18233e-12
GPX4	AL162274.2	0.311271	2.34445e-12
CASP9	OLMALINC	0.311165	2.387e-12
GPX4	FLJ20021	0.311157	2.39019e-12
AIM2	HLA-DQB1-AS1	0.310271	2.77661e-12
GPX4	AC147651.3	0.310266	2.77909e-12
CASP9	AC026801.2	0.310126	2.84549e-12
PRKACA	AC005332.4	0.30996	2.9263e-12
GSDMD	AC112491.1	0.309837	2.98769e-12
CASP6	AP005482.3	0.309779	3.01699e-12
CASP9	TRAM2-AS1	0.309609	3.10497e-12
PLCG1	AL132989.1	0.309524	3.1495e-12
CASP6	AC021028.1	0.309497	3.16409e-12
GSDMD	AC116407.2	0.309472	3.17732e-12
CASP3	AC020907.1	0.309455	3.18658e-12
CASP9	MCF2L-AS1	0.309408	3.21172e-12
GSDMB	AC005726.3	0.3094	3.21592e-12
GSDMB	AL031673.1	0.309205	3.32335e-12
CASP6	LINC01315	0.30919	3.33155e-12
CASP9	AC012073.1	0.309175	3.34044e-12
NLRP1	LINC00839	0.30909	3.38819e-12
PYCARD	AC133552.5	0.308868	3.51702e-12
GSDMA	AC008663.1	0.308317	3.85764e-12
TIRAP	AL031985.3	0.308277	3.88408e-12
GPX4	OLMALINC	0.308023	4.05296e-12
CASP9	AC007996.1	0.307938	4.11064e-12
CASP9	AP005482.3	0.307539	4.39497e-12
PRKACA	AC060780.1	0.307361	4.52711e-12
TIRAP	FAM160A1-DT	0.307178	4.66775e-12
CASP3	AL392172.1	0.307104	4.72554e-12
CASP6	SNHG12	0.306977	4.82672e-12
CASP6	AC079610.2	0.306606	5.1351e-12
NLRP1	AL049840.1	0.306589	5.14994e-12
GPX4	AC127024.5	0.306467	5.25538e-12
NOD1	AL354733.3	0.30642	5.29627e-12
CASP6	AC005332.4	0.30609	5.59546e-12
GSDMC	AC138207.4	0.305968	5.70974e-12
GSDMD	URB1-AS1	0.305921	5.75452e-12
GPX4	RNASEH1-AS1	0.305881	5.79362e-12
GSDMD	SNHG9	0.305867	5.80648e-12
GPX4	AP005482.3	0.305609	6.06127e-12
CASP9	AL365330.1	0.30558	6.08995e-12
GSDME	NOP14-AS1	0.305542	6.1289e-12
GPX4	AL021707.8	0.305281	6.39958e-12
GSDMA	FAM83A-AS1	0.305243	6.44004e-12
CASP6	AC036176.1	0.305131	6.56113e-12
CASP3	AC006449.6	0.30512	6.57325e-12
CASP1	LINC02100	0.305052	6.64734e-12
GPX4	AC016065.1	0.304876	6.84427e-12
GPX4	AC103591.3	0.304623	7.13575e-12
CASP6	AC090425.1	0.304611	7.15059e-12
GPX4	AC002116.2	0.304549	7.22349e-12
NLRP1	AC084018.1	0.304523	7.25495e-12
GSDMD	AC092171.5	0.304434	7.36239e-12
CASP1	AL596244.1	0.304258	7.57919e-12
CASP9	AL109811.3	0.304248	7.59172e-12
CASP6	LINC01560	0.304193	7.66112e-12
IL18	LINC01527	0.304111	7.76593e-12
CASP3	AC007406.5	0.303817	8.1521e-12
GSDMB	AC005332.5	0.303757	8.23283e-12
GSDMB	AL022328.1	0.30353	8.54656e-12
GSDMB	AL390719.2	0.303509	8.57601e-12
GSDMD	OSER1-DT	0.303385	8.75234e-12
CASP6	ZNF667-AS1	0.303336	8.82405e-12
GSDMB	AL136295.7	0.303298	8.87975e-12
CASP3	AATBC	0.303195	9.03125e-12
IL18	PICSAR	0.303182	9.0503e-12
NLRP1	AC067838.1	0.30313	9.12763e-12
CASP9	NIFK-AS1	0.30301	9.30893e-12
PRKACA	AC024075.1	0.302968	9.37356e-12
GSDMB	AL031186.1	0.302746	9.72171e-12
GPX4	AC015912.3	0.30273	9.74772e-12
SCAF11	SOX21-AS1	0.302687	9.81671e-12
GSDMD	AC092718.4	0.302494	1.0132e-11
CASP6	AL035258.1	0.30246	1.01886e-11
NLRP1	SNHG1	0.302456	1.01961e-11
GPX4	PCED1B-AS1	0.302438	1.02256e-11
CASP9	AC125257.1	0.302366	1.0348e-11
NLRP1	AC007038.2	0.302007	1.09749e-11
GSDMB	PTOV1-AS1	0.302006	1.09758e-11
GSDMD	AL391244.1	0.301969	1.10424e-11
PLCG1	C1RL-AS1	0.301902	1.11651e-11
GSDMD	AC002398.1	0.301676	1.15848e-11
TIRAP	TRAM2-AS1	0.301618	1.16953e-11
SCAF11	AL118506.1	0.301605	1.17195e-11
CASP3	AL354892.2	0.301572	1.17838e-11
CASP3	PTOV1-AS2	0.301344	1.22295e-11
GPX4	AC004687.1	0.301341	1.22369e-11
PRKACA	AC104794.2	0.30121	1.25006e-11
NLRP1	LENG8-AS1	0.301088	1.27525e-11
GSDMB	AL691482.3	0.301011	1.29127e-11
NLRP1	AL157394.1	0.300933	1.3079e-11
CASP6	AC010542.5	0.300884	1.31824e-11
PYCARD	AL354836.1	0.300811	1.33415e-11
NOD2	AC009902.2	0.300285	1.45348e-11
NLRP1	AC005332.5	0.300279	1.45489e-11
SCAF11	AL391121.1	0.300194	1.47506e-11
TIRAP	AC005586.1	0.30019	1.47595e-11
GSDMD	PTOV1-AS1	0.300091	1.49983e-11
GSDMD	FAM160A1-DT	-0.300644	1.37095e-11
PYCARD	AC008764.2	-0.301039	1.28554e-11
SCAF11	AL023284.4	-0.303687	8.32843e-12
NOD2	MELTF-AS1	-0.303706	8.30255e-12
GSDMC	AC084033.3	-0.304493	7.29078e-12
CASP4	AC139795.2	-0.304842	6.88179e-12
GSDMC	OLMALINC	-0.304909	6.80698e-12
SCAF11	AP003352.1	-0.305083	6.61328e-12
GSDMA	LINC00963	-0.305461	6.21149e-12
GSDME	SPINT1-AS1	-0.305636	6.03331e-12
SCAF11	AC018816.1	-0.306123	5.56532e-12
IL18	AC004656.1	-0.306488	5.23674e-12
CASP1	LOXL1-AS1	-0.306904	4.88587e-12
PYCARD	AC073046.1	-0.307285	4.58521e-12
CASP1	AC009506.1	-0.307608	4.34451e-12
SCAF11	AP001505.1	-0.307672	4.29787e-12
SCAF11	AC009065.4	-0.307802	4.20537e-12
GSDMA	AC091982.3	-0.308373	3.82215e-12
GSDME	AC108860.2	-0.309017	3.43032e-12
IL18	LINC00847	-0.309907	2.95288e-12
GSDMC	MAFG-DT	-0.310317	2.75542e-12
GSDMC	AC139795.2	-0.31117	2.38501e-12
GSDMA	AL035587.1	-0.31127	2.34484e-12
GSDMC	MCF2L-AS1	-0.311377	2.30245e-12
NOD2	AL035587.1	-0.311409	2.29009e-12
GSDMC	AL392172.1	-0.311443	2.27694e-12
PYCARD	AC099850.3	-0.311914	2.102e-12
GSDMA	TRAM2-AS1	-0.3124	1.93502e-12
GSDMD	AL049840.3	-0.312562	1.88255e-12
IL18	MIR600HG	-0.312688	1.84237e-12
GSDMC	LINC01006	-0.31282	1.80156e-12
GSDMC	AL035587.1	-0.312848	1.79305e-12
NOD2	AC084033.3	-0.313611	1.57388e-12
NOD2	AC018645.2	-0.313691	1.55248e-12
PYCARD	AC024075.1	-0.313848	1.51116e-12
SCAF11	FLJ46906	-0.314079	1.45266e-12
NOD2	LINC00847	-0.315213	1.19551e-12
SCAF11	AL451165.2	-0.316112	1.02396e-12
GSDME	MCF2L-AS1	-0.316797	9.09582e-13
SCAF11	AC087741.2	-0.316913	8.91506e-13
PYCARD	AL049840.2	-0.317084	8.65419e-13
CASP4	OLMALINC	-0.317322	8.30507e-13
PYCARD	AL450326.1	-0.317595	7.91994e-13
NOD2	AC005332.3	-0.318109	7.24327e-13
SCAF11	AC027644.3	-0.31812	7.23019e-13
CASP4	MAFG-DT	-0.318203	7.12605e-13
SCAF11	AC147067.1	-0.318671	6.56786e-13
GSDMC	AC096677.1	-0.318882	6.3305e-13
SCAF11	FOXN3-AS1	-0.319259	5.92762e-13
IL18	LINC00963	-0.319572	5.61222e-13
NOD2	LINC00339	-0.319704	5.48431e-13
NOD2	AC091982.3	-0.319708	5.47961e-13
GSDMA	AC009779.2	-0.320725	4.58536e-13
NOD1	AP001453.2	-0.320848	4.48679e-13
GSDMD	AL139385.1	-0.321106	4.28783e-13
GSDME	AL354892.2	-0.321327	4.12443e-13
NOD2	MAPKAPK5-AS1	-0.321775	3.81094e-13
NOD2	OSER1-DT	-0.321866	3.75087e-13
GSDME	AC104825.1	-0.32195	3.6955e-13
GSDMC	AC104794.2	-0.322192	3.54106e-13
GSDMC	AC009506.1	-0.322489	3.35976e-13
SCAF11	AL121832.2	-0.323855	2.63719e-13
GPX4	AL135818.2	-0.324371	2.4059e-13
GSDME	AC009506.1	-0.326242	1.7223e-13
PYCARD	AC108449.2	-0.326828	1.55037e-13
CASP4	AL354892.2	-0.32691	1.52765e-13
SCAF11	MHENCR	-0.32732	1.41891e-13
CASP4	LINC01006	-0.32782	1.29671e-13
CASP4	AC005332.6	-0.328125	1.22725e-13
SCAF11	YTHDF3-AS1	-0.328196	1.21169e-13
GSDME	DTX2P1-UPK3BP1-PMS2P11	-0.329084	1.0318e-13
CASP4	MIR600HG	-0.329338	9.85339e-14
SCAF11	MIR200CHG	-0.329726	9.18379e-14
CASP4	SREBF2-AS1	-0.329781	9.09316e-14
NOD2	AC012073.1	-0.330188	8.44524e-14
GSDMC	LINC00963	-0.330409	8.11107e-14
SCAF11	AC026979.2	-0.331078	7.18005e-14
NOD2	LINC00963	-0.33241	5.6272e-14
PYCARD	FGD5-AS1	-0.33264	5.39527e-14
GSDME	SREBF2-AS1	-0.332683	5.35247e-14
GSDMC	OSER1-DT	-0.335592	3.12904e-14
SCAF11	AP001453.2	-0.336258	2.76478e-14
PRKACA	AP001453.2	-0.336528	2.62924e-14
SCAF11	SNHG15	-0.337912	2.03063e-14
GSDMC	AL354892.2	-0.338142	1.94499e-14
GSDMC	AC091982.3	-0.338241	1.90925e-14
TIRAP	AL049840.4	-0.338587	1.78944e-14
SCAF11	AC040169.1	-0.338944	1.67344e-14
GSDME	MIR600HG	-0.339033	1.64575e-14
NOD2	TRAM2-AS1	-0.339468	1.5166e-14
PYCARD	AC108010.1	-0.340359	1.28208e-14
SCAF11	AL355353.1	-0.340485	1.25191e-14
CASP4	AC009506.1	-0.340674	1.20803e-14
CASP3	MIR193BHG	-0.340961	1.14415e-14
SCAF11	AC011445.2	-0.341316	1.06991e-14
TIRAP	MIR193BHG	-0.341488	1.03556e-14
SCAF11	CH17-340M24.3	-0.34155	1.02337e-14
PRKACA	AL049840.4	-0.341691	9.96396e-15
IL18	AC104794.2	-0.342414	8.68642e-15
SCAF11	LINC01137	-0.344198	6.17962e-15
PYCARD	AC092611.2	-0.344884	5.41931e-15
GSDMA	LINC00847	-0.345954	4.41159e-15
SCAF11	AP003068.1	-0.346334	4.10015e-15
GSDME	AC005332.4	-0.346865	3.70038e-15
GSDME	ELF3-AS1	-0.347885	3.03705e-15
GSDME	AC008124.1	-0.348024	2.95634e-15
SCAF11	MIR4435-2HG	-0.348104	2.91062e-15
GSDMD	PLBD1-AS1	-0.349466	2.23328e-15
GSDMC	TRAM2-AS1	-0.350344	1.88118e-15
GSDME	AC005586.1	-0.350549	1.8071e-15
SCAF11	AC138696.2	-0.350617	1.78352e-15
GSDMA	AC005332.6	-0.352104	1.33172e-15
NOD2	AC005332.6	-0.352858	1.14787e-15
SCAF11	AC133552.5	-0.353122	1.08948e-15
PYCARD	AC073569.2	-0.353281	1.05569e-15
TIRAP	AP001453.2	-0.354077	9.01809e-16
GSDMC	AC009779.2	-0.35425	8.71468e-16
NOD2	AL392172.1	-0.354664	8.02725e-16
SCAF11	AC055822.1	-0.354872	7.70168e-16
PRKACA	AC104031.1	-0.355602	6.65967e-16
IL18	AC005332.6	-0.356872	5.1677e-16
GSDMD	AL049840.2	-0.35693	5.10734e-16
CASP4	LOXL1-AS1	-0.358223	3.94029e-16
SCAF11	SNHG8	-0.361151	2.17917e-16
NOD2	AC009779.2	-0.362941	1.51284e-16
GSDMD	AC073046.1	-0.363732	1.28657e-16
SCAF11	AC015912.3	-0.363839	1.25855e-16
SCAF11	LINC01023	-0.366427	7.3818e-17
SCAF11	AC073896.4	-0.367301	6.15836e-17
GSDME	SOX21-AS1	-0.367447	5.97431e-17
SCAF11	AC103691.1	-0.36871	4.59192e-17
GSDMC	AC005332.6	-0.370158	3.39178e-17
SCAF11	ZSCAN16-AS1	-0.37039	3.23037e-17
PRKACA	NOP14-AS1	-0.371741	2.43111e-17
SCAF11	AL021707.6	-0.372256	2.18043e-17
GSDME	AC010503.4	-0.373082	1.83073e-17
IL18	AC139795.2	-0.379088	5.05838e-18
SCAF11	CYTOR	-0.38066	3.59639e-18
GPX4	AL049840.3	-0.384334	1.60879e-18
SCAF11	PRR34-AS1	-0.384751	1.46767e-18
SCAF11	SNHG25	-0.389501	5.10145e-19
SCAF11	AC108673.3	-0.390893	3.73064e-19
SCAF11	FLJ20021	-0.405743	1.20556e-20
SCAF11	AC008608.2	-0.408658	6.01979e-21
SCAF11	AC012510.1	-0.410791	3.60684e-21
GPX4	AL049840.2	-0.417548	6.94359e-22
GSDMD	AC092611.2	-0.420553	3.29677e-22
IL18	LINC01006	-0.432936	1.41384e-23
SCAF11	AL049840.4	-0.438202	3.56076e-24

## Sheet: Table S7
gene	KM	B	SE	HR	HR.95L	HR.95H	pvalue
LINC01963	0.0237934	-0.289027	0.0896129	0.748992	0.628346	0.892803	0.00125848
AC036176.1	0.0236615	-0.230347	0.113746	0.794258	0.635537	0.992617	0.0428561
AC067838.1	0.0158531	-0.198567	0.0991981	0.819905	0.675035	0.995867	0.045315
RUSC1-AS1	0.0488157	-0.362481	0.145185	0.695948	0.523594	0.925036	0.0125362
AL132989.1	0.0138947	-0.54245	0.172304	0.581322	0.414717	0.81486	0.00164276
AATBC	0.0152295	-0.144682	0.070383	0.865297	0.753798	0.993289	0.0398172
ELF3-AS1	0.0209882	-0.188014	0.0900453	0.828603	0.694544	0.988538	0.0367983
AC135050.6	0.045556	-0.071929	0.0301959	0.930597	0.87712	0.987335	0.0172154
AC016876.1	0.0332945	-0.0378506	0.017932	0.962857	0.929604	0.997299	0.0347908
AL161431.1	0.041668	0.0120271	0.00463907	1.0121	1.00294	1.02134	0.00952613
AC060780.1	0.0383493	-0.334836	0.144864	0.715455	0.538609	0.950367	0.0208121
AC012615.1	0.00668193	-0.200957	0.0849279	0.817948	0.692524	0.966087	0.0179717
C1RL-AS1	0.0129454	-0.365817	0.168127	0.693629	0.498905	0.964356	0.0295672
AC139530.1	0.0356767	-0.254987	0.122888	0.774927	0.609058	0.985969	0.0379909
AL451085.2	0.0160419	-0.431457	0.19184	0.649562	0.445991	0.946052	0.0245097
AC007991.2	0.000463979	-0.150894	0.0637966	0.859939	0.758864	0.974476	0.0180186
AC098487.1	0.0067104	0.3452	0.138627	1.41227	1.07626	1.85318	0.0127698
PTOV1-AS2	3.79621e-05	-0.244829	0.0693204	0.782838	0.683386	0.896763	0.000412661
LINC00460	0.00173753	0.0812792	0.0258137	1.08467	1.03116	1.14096	0.00164005
AL691482.3	0.00441733	-0.18296	0.0931647	0.832801	0.693808	0.999639	0.0495489
AC093278.2	0.00289727	-0.381736	0.13698	0.682675	0.521935	0.892919	0.0053232
AC012467.2	0.0144401	-0.430229	0.174343	0.65036	0.462118	0.915282	0.0135979
AL022328.1	0.00701544	-0.506814	0.181336	0.602412	0.422221	0.859502	0.0051917
AC004687.1	0.000468358	-0.220801	0.0846636	0.801876	0.679269	0.946615	0.00910785
AC020907.1	0.0433995	-0.147974	0.0553952	0.862453	0.773719	0.961365	0.00755707
AL928654.2	0.00348653	-0.202916	0.0896048	0.816347	0.684862	0.973076	0.0235395
LINC00342	0.00279754	-0.142709	0.0609636	0.867007	0.769361	0.977046	0.0192384
LINC00958	0.00507699	0.0185679	0.00509197	1.01874	1.00862	1.02896	0.000265836
LINC01089	0.000167034	-0.294705	0.113045	0.744752	0.596743	0.92947	0.00913459
CTBP1-DT	0.00304441	-0.247871	0.0963633	0.780461	0.64614	0.942705	0.010104
AC084018.1	0.00815438	-0.276006	0.0970305	0.758809	0.627393	0.917751	0.00444781
AC116914.2	0.000789891	-0.534188	0.153946	0.586145	0.433477	0.792581	0.000520498
AC008115.3	0.0119697	-0.678783	0.190392	0.507234	0.349258	0.736665	0.000363593
AC108449.2	0.0488621	-0.209319	0.097699	0.811137	0.669781	0.982326	0.0321545
AL354733.3	0.00202454	-0.483842	0.162922	0.616411	0.44791	0.8483	0.00298016
AC008735.2	0.0155652	-0.14572	0.0668277	0.8644	0.758282	0.985368	0.029218
PSMA3-AS1	0.00658205	-0.146375	0.0625219	0.863833	0.764207	0.976447	0.0192228
PCED1B-AS1	0.0144016	-0.171237	0.0594194	0.842622	0.749989	0.946696	0.00395362
AC048341.2	0.026267	-0.167295	0.0822547	0.84595	0.719994	0.993939	0.0419647
AC103702.2	0.00995917	0.0533053	0.0183917	1.05475	1.01741	1.09347	0.00375149
AC015849.3	0.0255108	-0.38767	0.129241	0.678636	0.526777	0.874274	0.00270351
TNRC6C-AS1	0.0444731	-0.17573	0.0651905	0.838844	0.738229	0.953173	0.00702532
AL360181.2	0.00236533	-0.356421	0.140703	0.700177	0.531425	0.922517	0.0113042
EP300-AS1	0.0201857	-0.46907	0.15131	0.625584	0.46504	0.841552	0.00193485
AC004918.3	0.000157356	-0.237722	0.11264	0.788422	0.632237	0.983191	0.0348186
DTX2P1-UPK3BP1-PMS2P11	0.0140055	-0.460154	0.165612	0.631186	0.456234	0.873227	0.00546099
MYOSLID	0.000939871	0.0393575	0.0121765	1.04014	1.01561	1.06526	0.00122813
AL355488.1	0.0255407	-0.320041	0.125835	0.726119	0.56741	0.92922	0.0109796
MIR9-3HG	0.00634279	-0.134813	0.0436762	0.873879	0.802184	0.951982	0.00202427
AL022328.2	0.00703841	-0.270906	0.102813	0.762688	0.623494	0.932957	0.00841524
AC004148.2	0.00155453	-0.272056	0.123047	0.761812	0.598563	0.969584	0.0270362
AL035587.1	0.0111308	-0.414892	0.135924	0.660412	0.50596	0.862011	0.00227025
IER3-AS1	0.00815121	0.156749	0.0759937	1.1697	1.00783	1.35757	0.0391456
ZNF710-AS1	0.013385	-0.179035	0.0777247	0.836076	0.717937	0.973656	0.0212533
AC024075.2	0.000508842	-0.300781	0.0791873	0.74024	0.633823	0.864524	0.000145667
AC108010.1	0.00938224	-0.326128	0.124738	0.721713	0.565181	0.921597	0.00893543
AL450992.2	0.000536995	-0.0532761	0.0194931	0.948118	0.912578	0.985043	0.00627464

## Sheet: Table S8
id	coef	HR
LINC01963	-0.294937	0.744579
AL132989.1	-0.390498	0.67672
AC060780.1	0.34934	1.41813
AL451085.2	-0.61741	0.53934
AC098487.1	0.307176	1.35958
PTOV1-AS2	-0.226887	0.797011
LINC00460	0.0581887	1.05991
AC012467.2	0.620767	1.86035
LINC00958	0.0112852	1.01135
CTBP1-DT	-0.15581	0.855721
AC116914.2	-0.488575	0.6135
AC103702.2	0.0371801	1.03788
AL022328.2	0.411951	1.50976
AL450992.2	-0.0594818	0.942253
